# Supplementary material for: A predictive toolset for the identification of effective lignocellulosic pretreatment solvents: a case study of solvents tailored for lignin extraction
Source: Royal Society of Chemistry journal article supplement (doi:10.1039/d1gc01186c), 2021-01-01
Supplement: d1gc01186c1.pdf [file d1gc01186c1.pdf]

## *Supplementary Information*

### **A predictive toolset for the identification of effective lignocellulosic pretreatment solvents: A case study of solvents tailored for lignin extraction**

Ezinne C. Achinivu<sup>1,2,#</sup>, Mood Mohan<sup>1,2,#</sup>, Hemant Choudhary<sup>1,2</sup>, Lalitendu Das<sup>1,2</sup>, Kaixuan Huang<sup>1,3,4</sup>, Harsha D. Magurudeniya<sup>1,2</sup>, Venkataramana R. Pidatala<sup>1,3</sup>, Anthe George<sup>1,2</sup>, Blake A. Simmons<sup>1,3</sup>, John M. Gladden<sup>\*,1,2</sup>

<sup>1</sup> Deconstruction Division, Joint BioEnergy Institute, 5885 Hollis Street, Emeryville, California 94608, United States.

<sup>2</sup> Department of Biomaterials and Biomanufacturing, Sandia National Laboratories, 7011 East Avenue, Livermore, California 94551, United States.

<sup>3</sup> Biological Systems and Engineering Division, Lawrence Berkeley National Laboratory, 1 Cyclotron Road, Berkeley, California 94720, United States.

<sup>4</sup> Key Laboratory of Forestry Genetics & Biotechnology (Nanjing Forestry University), Ministry of Education, Nanjing 210037, People's Republic of China.

\*Corresponding Author

E-mail: [jmgladden@lbl.gov](mailto:jmgladden@lbl.gov); [jmgladd@sandia.gov](mailto:jmgladd@sandia.gov) (J. M. Gladden)

# E. C. Achinivu and M. Mohan contributed equally to this work

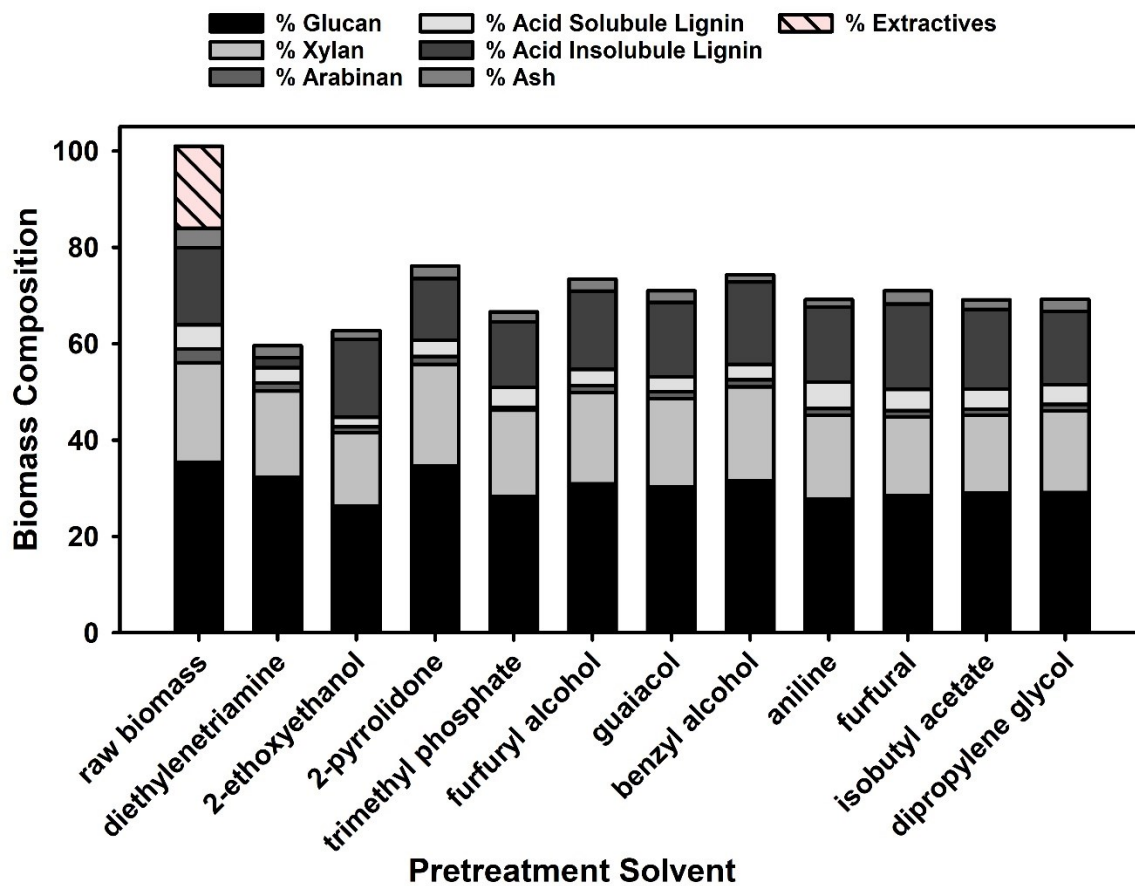

**Fig. S1** Biomass yield and composition after pretreatment of sorghum with the organic solvents.

The composition of the untreated “raw biomass” is also displayed.

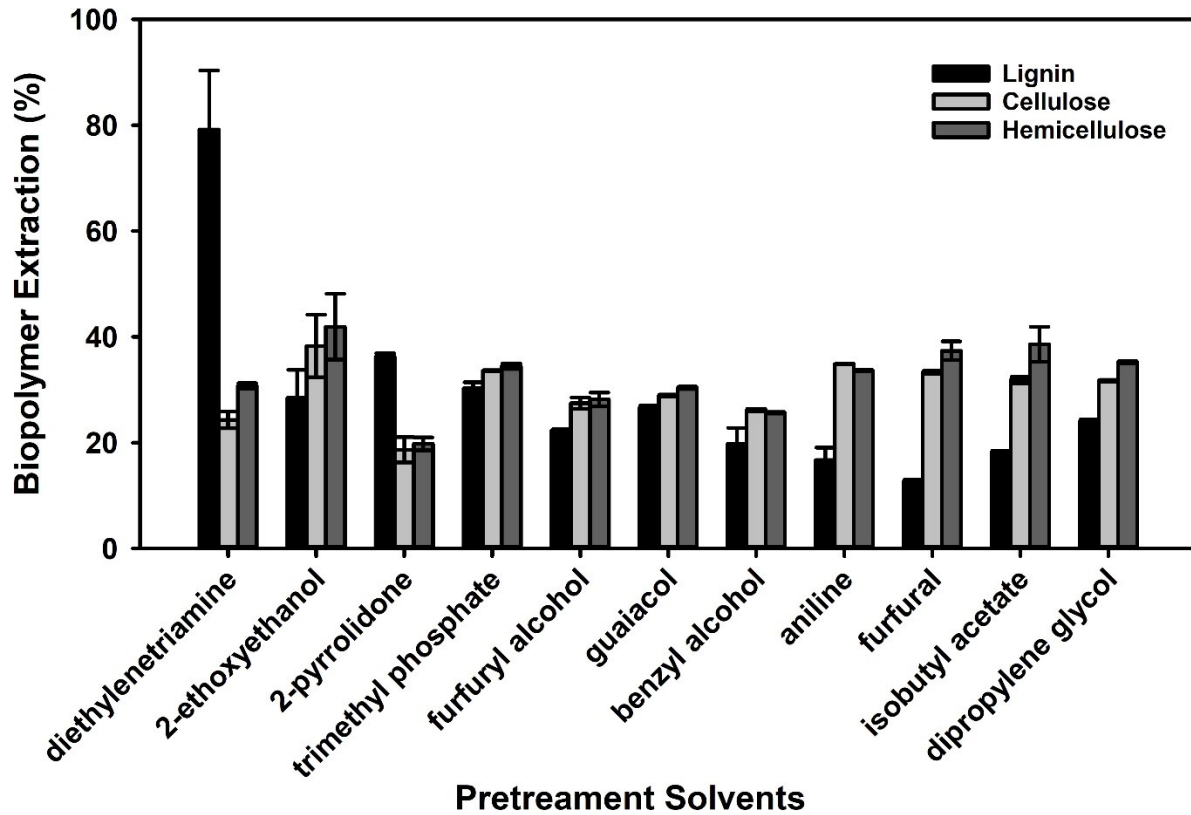

**Fig. S2** Amount of each biopolymer (lignin, cellulose, and hemicellulose) that was removed during pretreatment and solvent recovery.

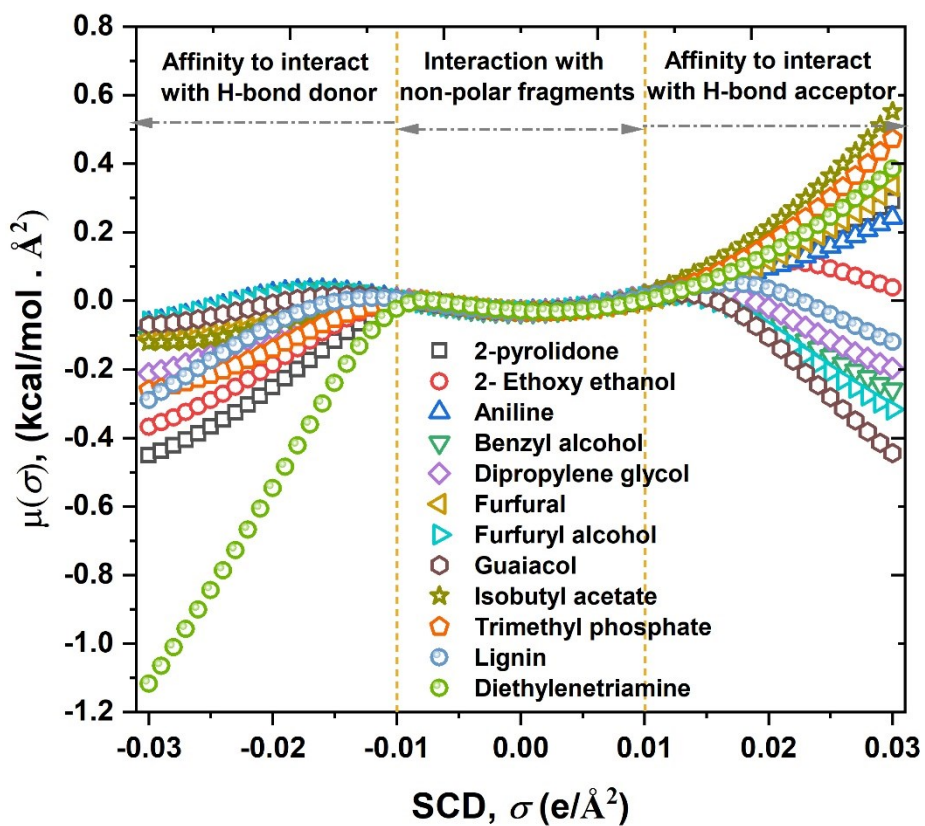

(a)

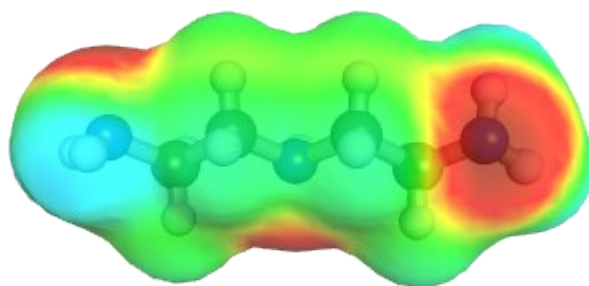

(b)

**Fig. S3** (a) Sigma potentials of lignin and molecular solvents predicted by COSMO-RS. (b) COSMO cavity (surface polarity) diagram of diethylenetriamine (here the extent of screening charge varies from  $-0.03 \text{ e} \cdot \text{\AA}^{-2}$  (red) to  $+0.03 \text{ e} \cdot \text{\AA}^{-2}$  (blue)). The intermediate (non-polar) region is represented by green and yellow colors.

**Table S1:** Predicted excess enthalpy, activity coefficient, and viscosity of amines for cellulose by COSMO-RS

| Solvent                         | $H^E$ (kcal/mol) | $\ln(\gamma)$ | Viscosity, cP |
|---------------------------------|------------------|---------------|---------------|
| 1,3-diaminopropane              | -1.57            | -5.01         | 0.63          |
| 1,4-diaminobutane (Putrescine)  | -1.55            | -4.79         | 0.76          |
| 1,5-diaminopentane (Cadaverine) | -1.56            | -4.63         | 0.89          |
| 1,2-diaminopropane              | -1.48            | -4.58         | 0.57          |
| Spermine                        | -1.57            | -4.64         | 6.82          |
| Spermidine                      | -1.55            | -4.60         | 2.26          |
| 2,2-dimethyl-1,3-propanediamine | -0.88            | -2.13         | 0.50          |
| Ethylenediamine                 | -1.46            | -4.84         | 0.54          |
| Diethylenetriamine              | -1.42            | -4.50         | 1.42          |
| Pentylamine                     | 0.07             | -0.04         | 0.65          |
| Aniline                         | -1.43            | -3.04         | 0.37          |
| 2-ethoxy Ethanol                | -0.07            | -0.32         | 1.47          |
| 2-pyrrolidone                   | -0.54            | -2.25         | 0.78          |
| Trimethyl phosphate             | -0.29            | -0.92         | 0.63          |
| Furfuryl alcohol                | 0.01             | -0.12         | 1.51          |
| Guaiacol                        | 0.01             | -0.08         | 3.77          |
| Benzyl alcohol                  | 0.03             | 0.01          | 1.60          |
| Furfural                        | 0.01             | -0.21         | 0.64          |
| Isobutyl acetate                | -0.11            | -0.05         | 0.36          |
| Dipropylene glycol              | 0.00             | -0.06         | 8.27          |

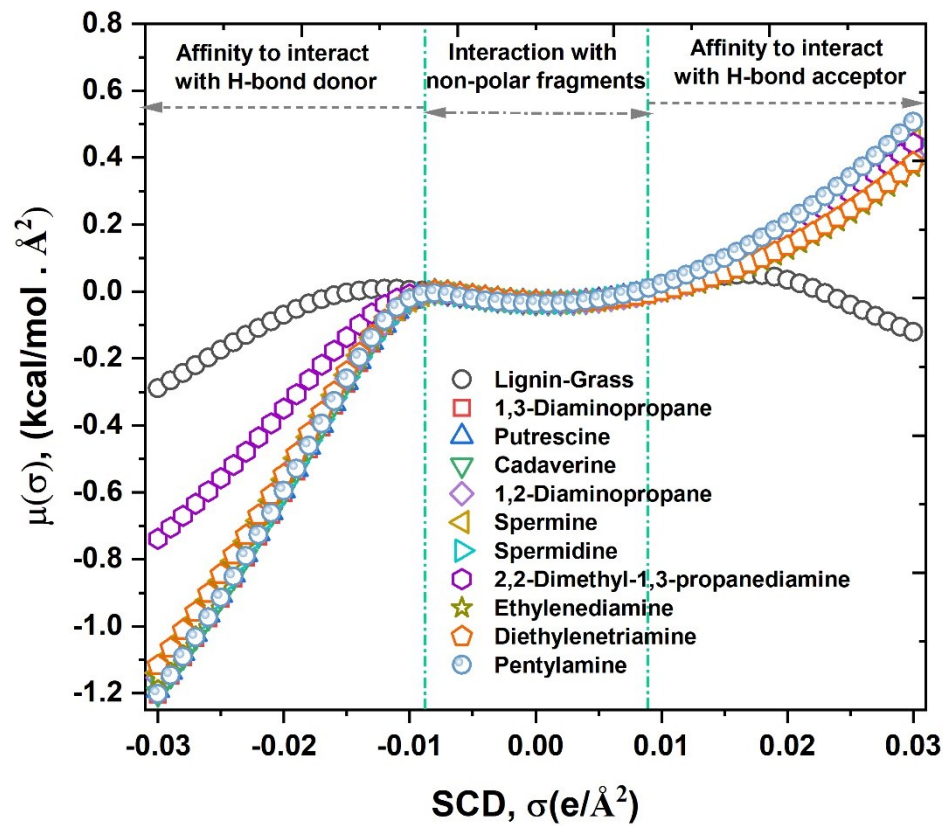

Fig. S4 COSMO-RS-based predicted sigma potentials of lignin and amines.

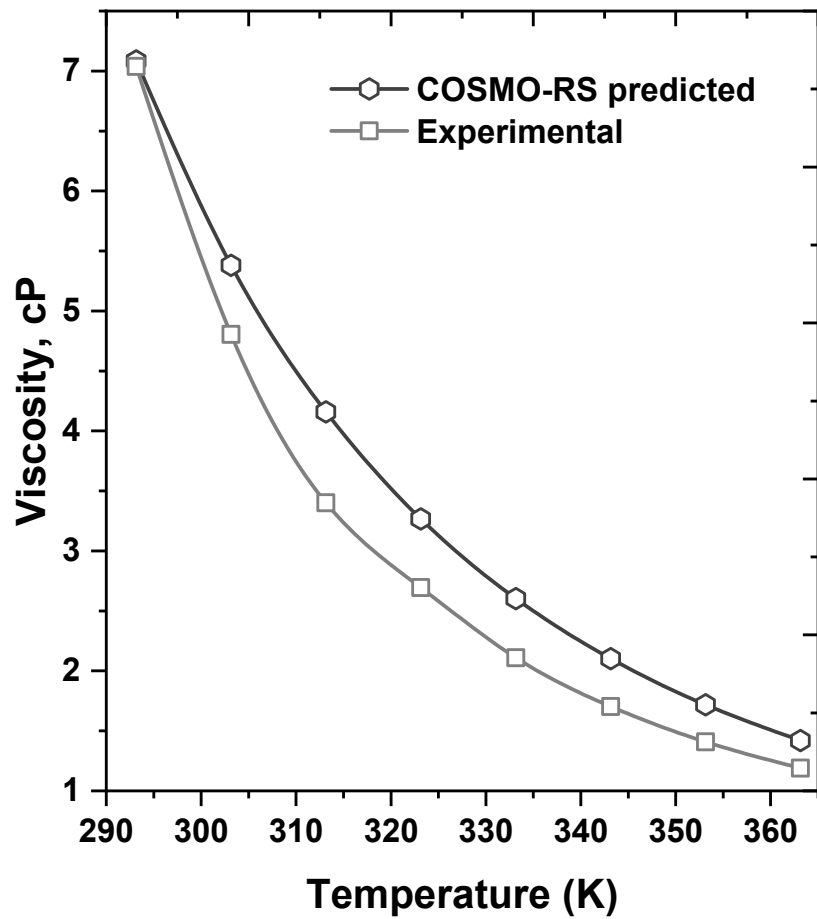

**Fig. S5** Experimental and COSMO-RS predicted viscosities of diethylenetriamine at different temperatures.

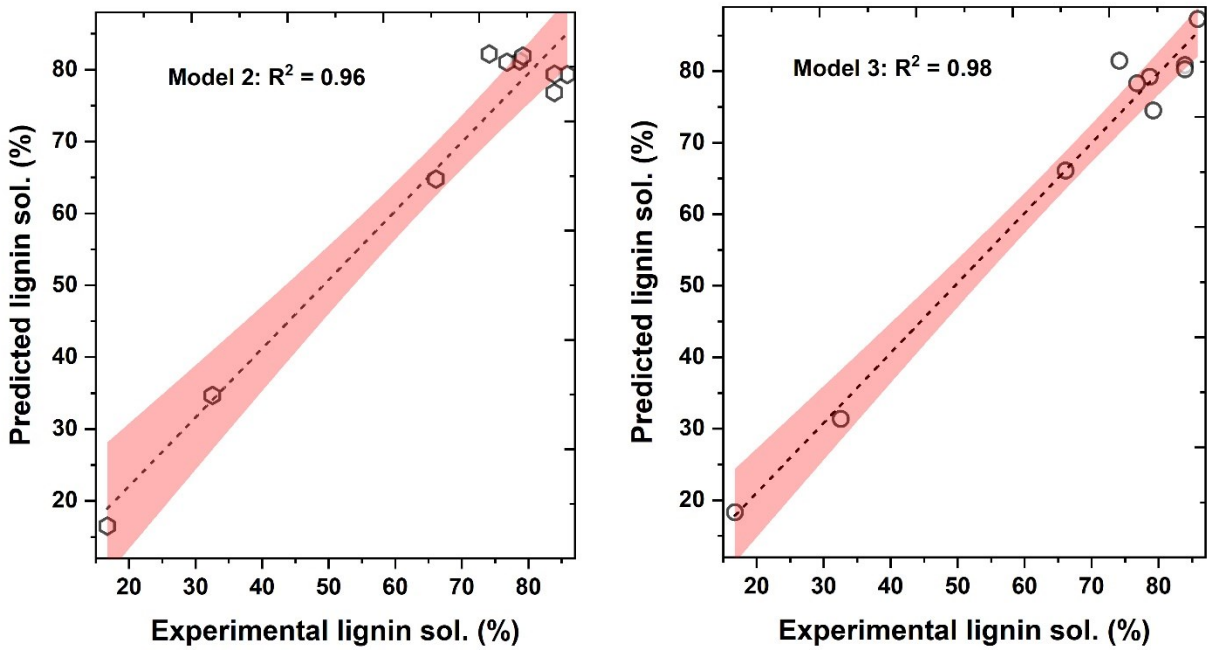

**Fig. S6** Experimental and COSMO-RS-based developed models 2 & 3 predicted lignin solubility for amines with 95% confidence error band.



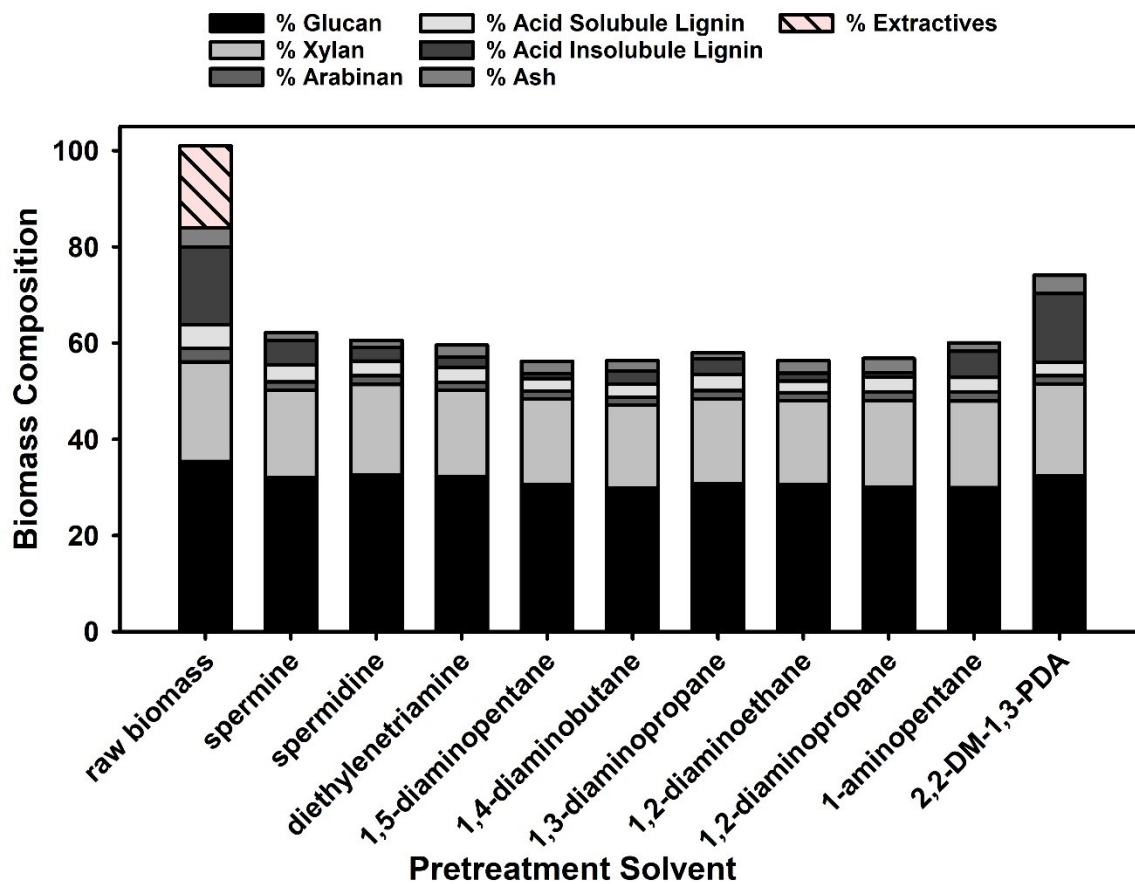

**Fig. S7** Biomass yield and composition after pretreatment of sorghum with the amies. The composition of the untreated “raw biomass” is also displayed.

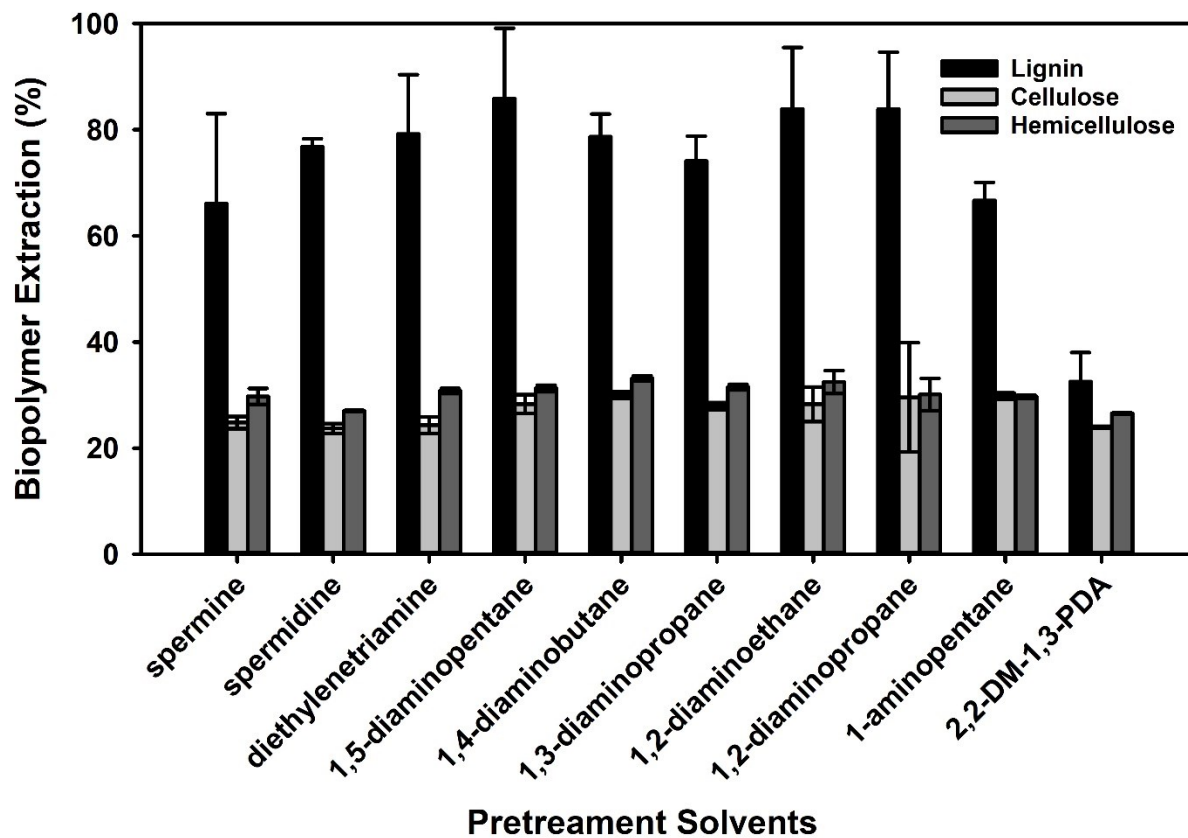

**Fig. S8** Amount of each biopolymer (lignin, cellulose, and hemicellulose) that was removed during pretreatment and solvent recovery.

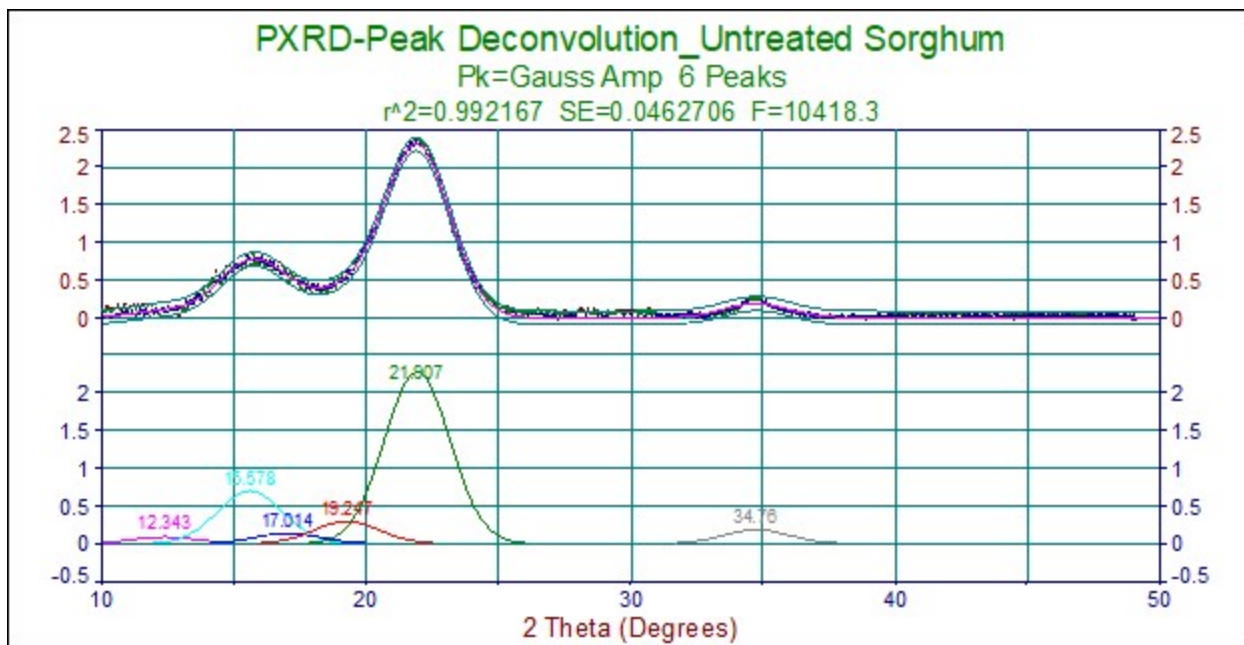

**Fig. S9** X-ray diffraction profiles for untreated sorghum along with results from peak deconvolution.

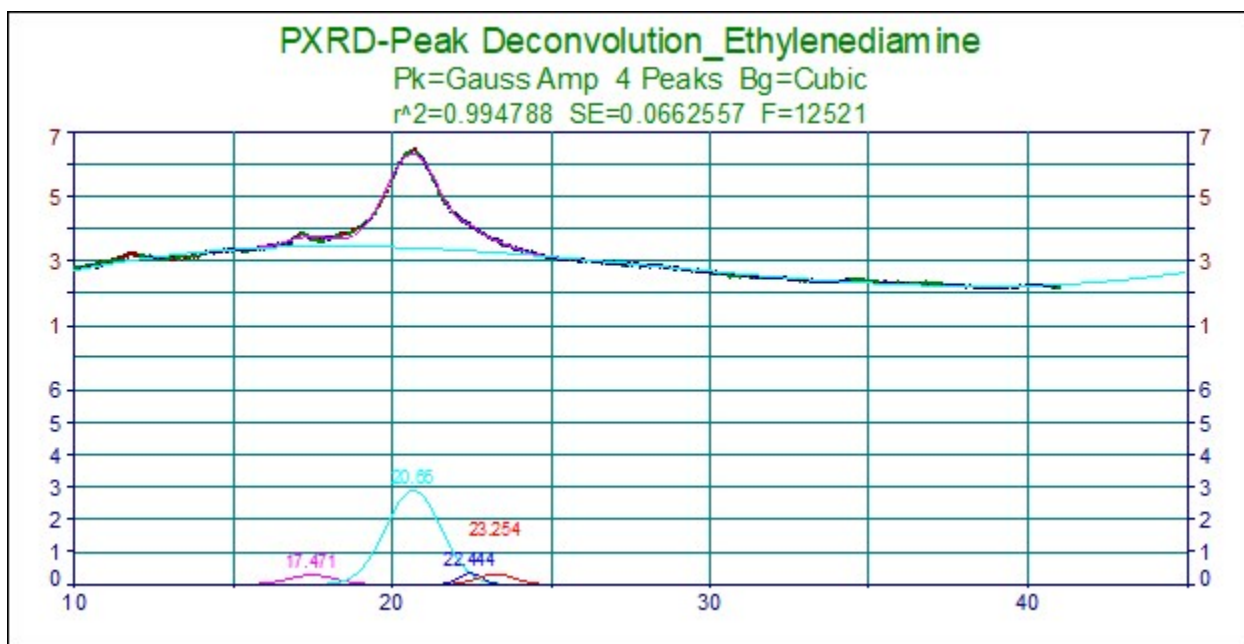

**Fig. S10** X-ray diffraction profiles for ethylenediamine-treated sorghum along with results from peak deconvolution.

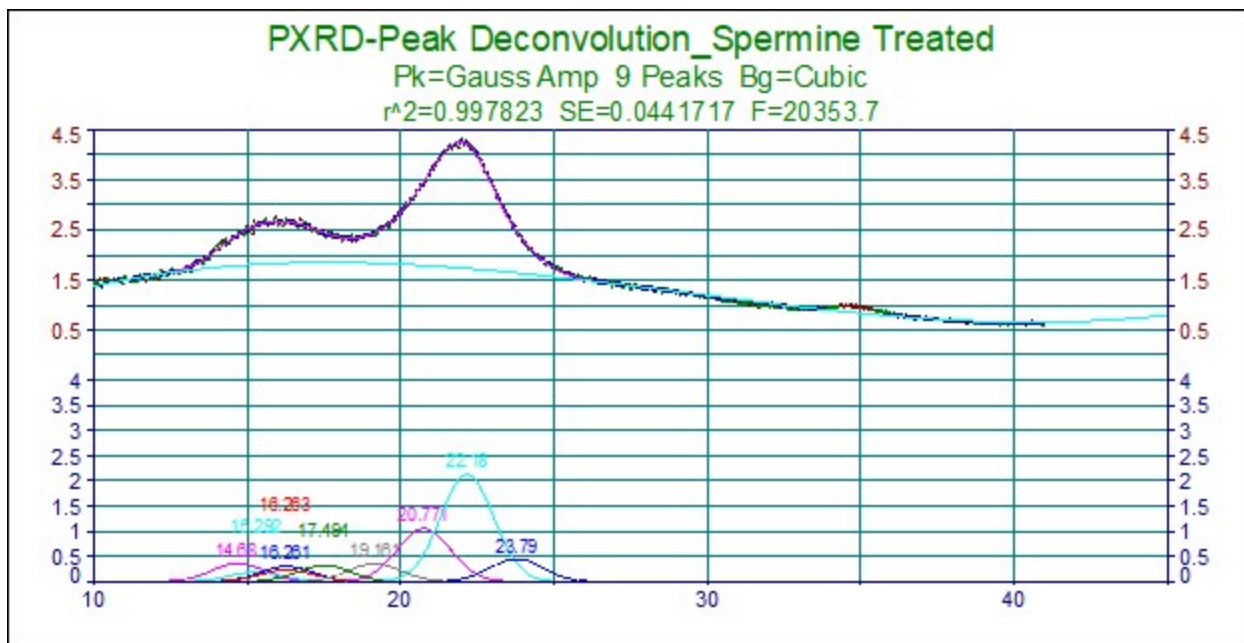

**Fig. S11** X-ray diffraction profiles for spermine-treated sorghum along with results from peak deconvolution.

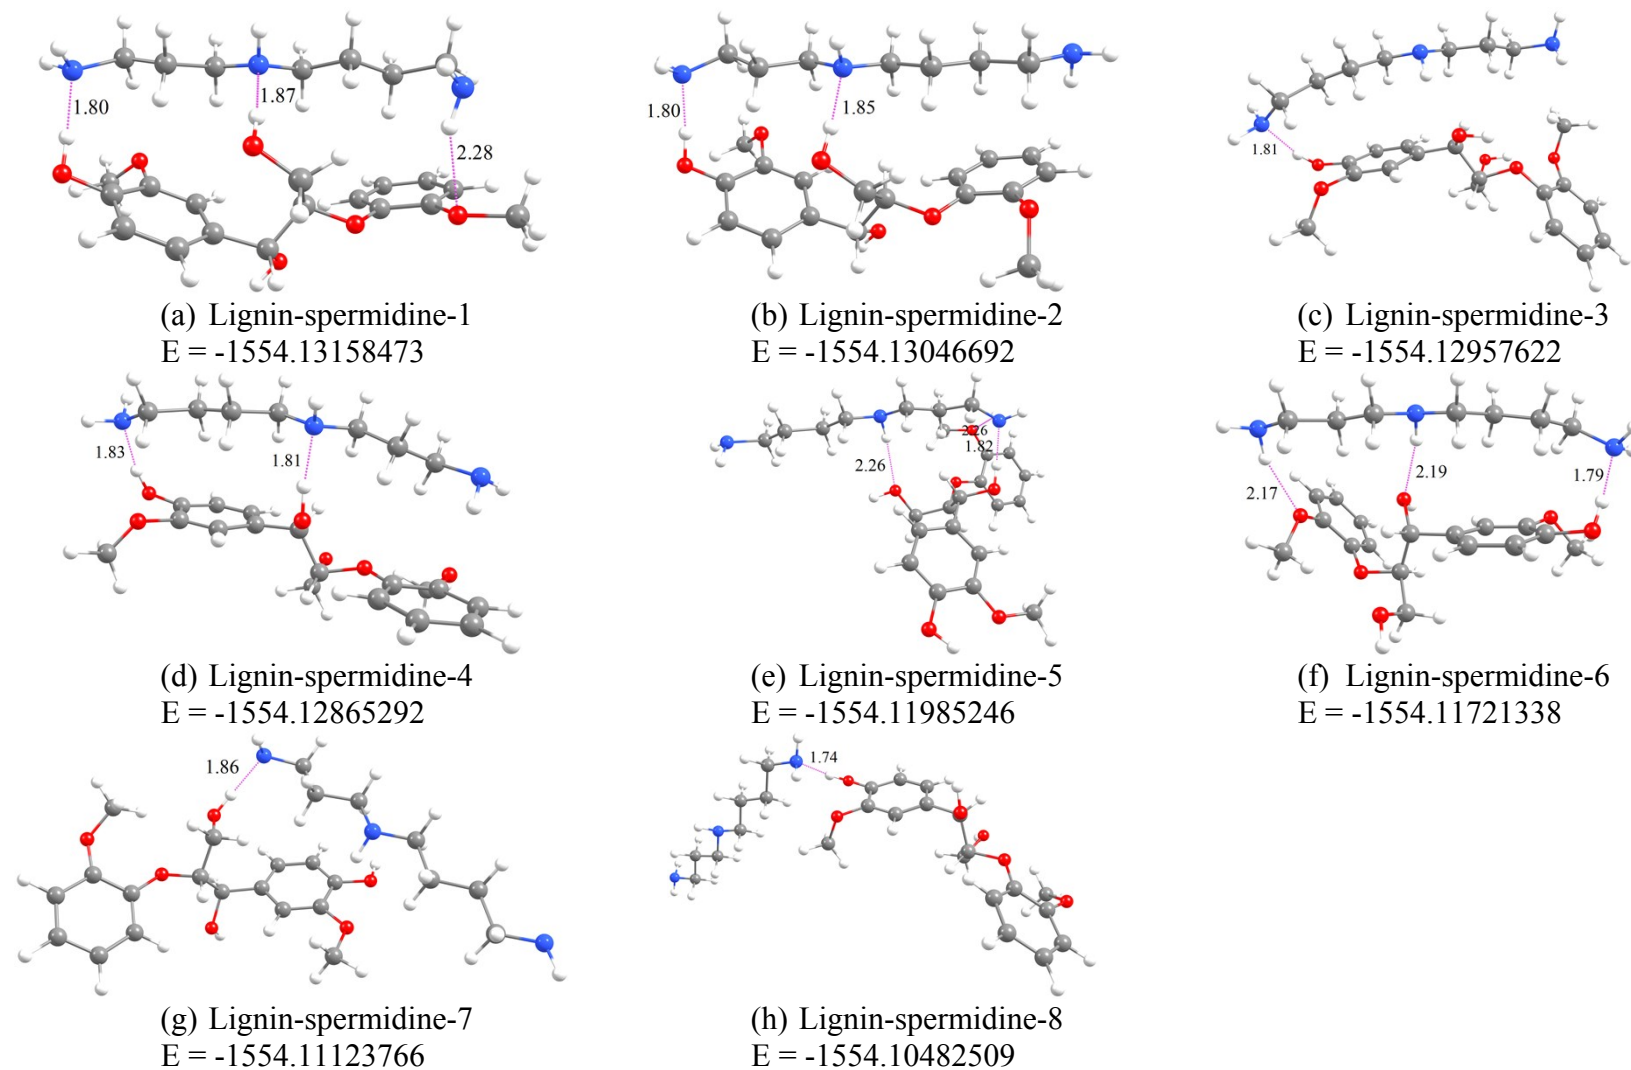

**Fig. S12:** The optimized configurations of lignin-spermidine-n (n=1-8) at B3LYP-GD3BJ/6-311+g(d,p) level. The hydrogen bonds are indicated by dashed lines and bond distances are given in Å.

**Table S2:** Hydrogen bonds, relative optimized complex energy ( $\Delta E_{\text{relative}}$ ), and Fi-SAFT predicted interaction energy (I.E.) between the different conformers of lignin and spermidine

| Lignin–spermidine | H-bonding     | Distance (Å) | $\Delta E_{\text{relative}}^a$ ,<br>(kJ/mol) | I. E., (kJ/mol) |
|-------------------|---------------|--------------|----------------------------------------------|-----------------|
| Conformer 1       | O23-H42...N43 | 1.80         | 0.00                                         | -133.37         |
|                   | O13-H32...N47 | 1.87         |                                              |                 |
|                   | N52-H64...O8  | 2.28         |                                              |                 |
| Conformer 2       | O23-H42...N43 | 1.80         | 2.93                                         | -131.61         |
|                   | O13-H32...N47 | 1.85         |                                              |                 |
| Conformer 3       | O23-H43...N53 | 1.81         | 24.16                                        | -95.29          |
| Conformer 4       | O23-H42...N52 | 1.83         | 30.41                                        | -138.36         |
|                   | O11-H31...N47 | 1.81         |                                              |                 |
| Conformer 5       | O11-H31...N43 | 1.82         | 33.07                                        | -81.00          |
|                   | N47-H71...O13 | 2.26         |                                              |                 |
|                   | N43-H53...O8  | 2.26         |                                              |                 |
| Conformer 6       | O23-H42...N52 | 1.79         | 45.10                                        | -107.82         |
|                   | N47-H71...O11 | 2.19         |                                              |                 |
|                   | N43-H53...O8  | 2.17         |                                              |                 |
| Conformer 7       | O13-H32...N42 | 1.86         | 57.12                                        | -70.95          |
| Conformer 8       | O23-H42...N52 | 1.74         | 77.17                                        | -59.88          |

$$^a \Delta E_{\text{relative}} \text{ (kJ/mol)} = (E_{\text{conformer1}} - E_{\text{conformer (1 to n)}}) \times 2625.5$$

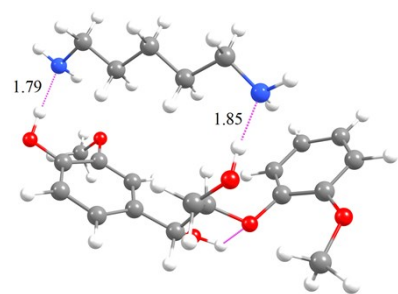

(a) Lignin-1,5-diaminopentane-1  
E = -1420.11676348

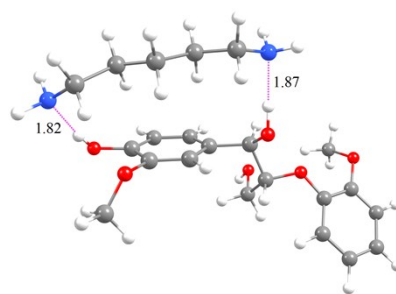

(b) Lignin-1,5-diaminopentane-2  
E = -1420.10651846

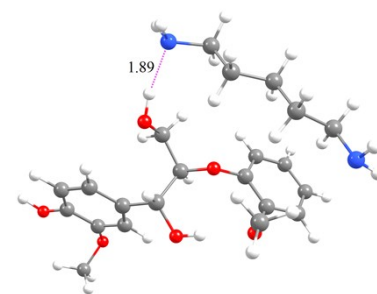

(c) Lignin-1,5-diaminopentane-3  
E = -1420.1011913

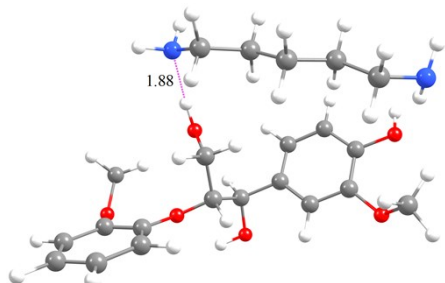

(d) Lignin-1,5-diaminopentane-4  
E = -1420.0976949

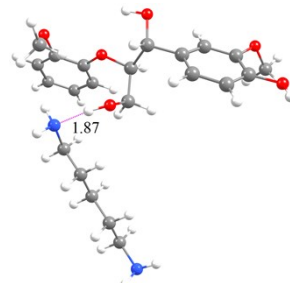

(e) Lignin-1,5-diaminopentane-5  
E = -1420.09542386

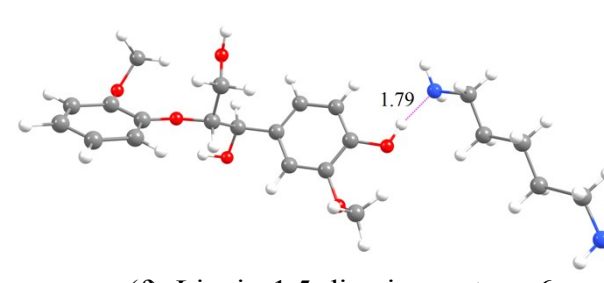

(f) Lignin-1,5-diaminopentane-6  
E = -1420.09164645

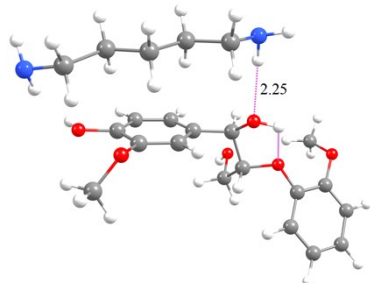

(g) Lignin-1,5-diaminopentane-7  
E = -1420.08807239

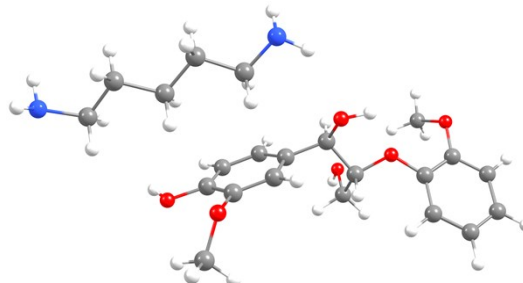

(h) Lignin-1,5-diaminopentane-8  
E = -1420.08309528

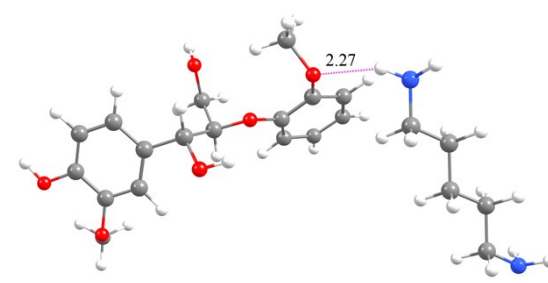

(i) Lignin-1,5-diaminopentane-9  
E = -1420.08029283

**Fig. S13:** The optimized configurations of lignin-1,5-diaminopentane- $n$  ( $n=1-9$ ) at B3LYP-GD3BJ/6-311+g(d,p) level. The hydrogen bonds are indicated by dashed lines and bond distances are given in Å.

**Table S3:** Hydrogen bonds, relative optimized complex energy ( $\Delta E_{\text{relative}}$ ), and Fi-SAFT predicted interaction energy (I.E.) between the different conformers of lignin and 1,5-diaminopentane

| Lignin–1,5-diaminopentane | H-bonding     | Distance (Å) | $\Delta E_{\text{relative}}^a$ , (kJ/mol) | I. E., (kJ/mol) |
|---------------------------|---------------|--------------|-------------------------------------------|-----------------|
| Conformer 1               | O23-H43...N44 | 1.79         | 0.00                                      | -122.45         |
|                           | O13-H32...N50 | 1.85         |                                           |                 |
| Conformer 2               | O11-H31...N44 | 1.87         | 26.89                                     | -106.28         |
|                           | O23-H43...N50 | 1.82         |                                           |                 |
| Conformer 3               | O13-H32...N50 | 1.89         | 40.87                                     | -70.77          |
| Conformer 4               | O13-H32...N44 | 1.88         | 50.04                                     | -62.30          |
| Conformer 5               | O13-H32...N44 | 1.87         | 56.00                                     | -58.87          |
| Conformer 6               | O23-H43...N44 | 1.79         | 65.91                                     | -52.77          |
| Conformer 7               | N44-H52...O11 | 2.25         | 75.29                                     | -38.68          |
| Conformer 8               | -             | -            | 88.35                                     | -27.12          |
| Conformer 9               | N44-H51...O8  | 2.27         | 95.71                                     | -22.16          |

<sup>a</sup>  $\Delta E_{\text{relative}}$  (kJ/mol) =  $(E_{\text{conformer1}} - E_{\text{conformer (1 to n)}}) \times 2625.5$



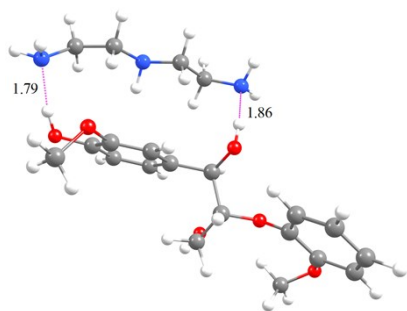

(a) Lignin-diethylenetriamine-1  
E = -1436.13906674

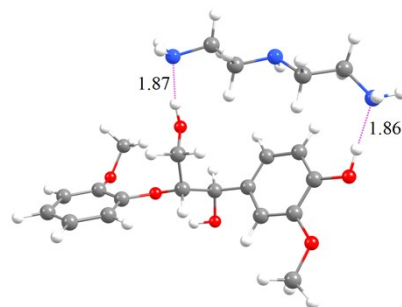

(b) Lignin-diethylenetriamine-2  
E = -1436.1389427

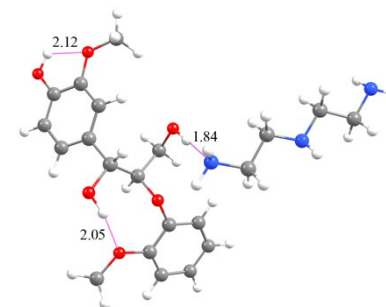

(c) Lignin-diethylenetriamine-3  
E = -1436.1387904

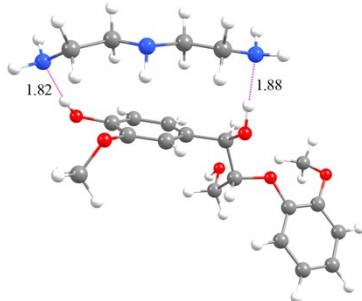

(d) Lignin-diethylenetriamine-4  
E = -1436.13876351

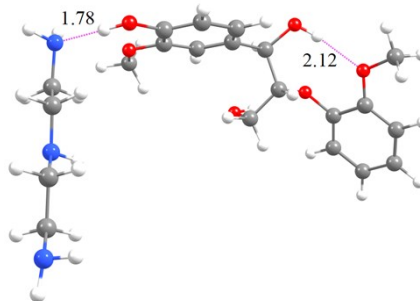

(e) Lignin-diethylenetriamine-5  
E = -1436.13687466

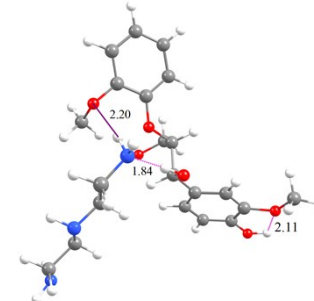

(f) Lignin-diethylenetriamine-6  
E = -1436.13651502

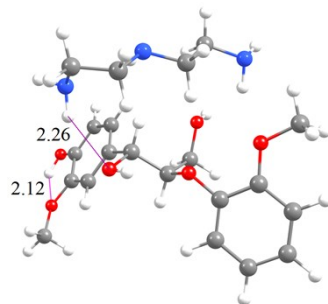

(g) Lignin-diethylenetriamine-7  
E = -1436.1355878

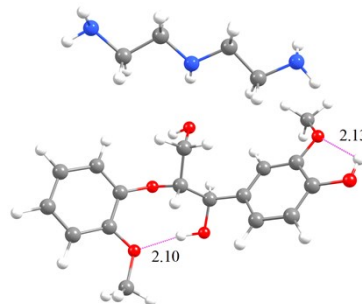

(h) Lignin-diethylenetriamine-8  
E = -1436.13372532

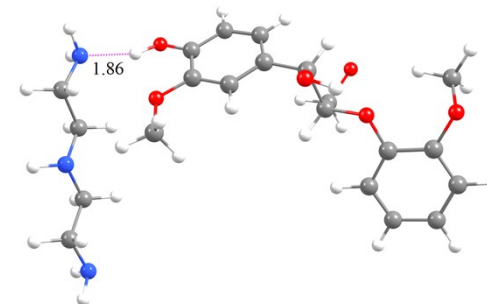

(i) Lignin-diethylenetriamine-9  
E = -1436.131842

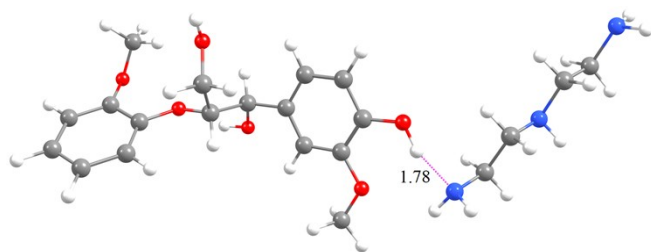

(j) Lignin-diethylenetriamine-10  
E = -1436.12848412

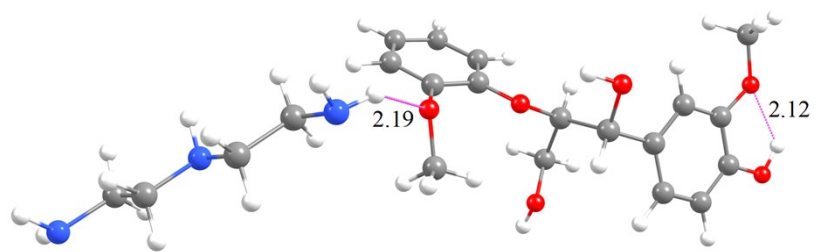

(k) Lignin-diethylenetriamine-11  
E = -1436.12100633

**Fig. S14:** The optimized configurations of lignin-diethylenetriamine-n (n=1-11) at B3LYP-GD3BJ/6-311+g(d,p) level. The hydrogen bonds are indicated by dashed lines and bond distances are given in Å.

**Table S4:** Hydrogen bonds, relative optimized complex energy ( $\Delta E_{\text{relative}}$ ), and Fi-SAFT predicted interaction energy (I.E.) between the different conformers of lignin and diethylenetriamine

| Lignin–diethylenetriamine | H-bonding     | Distance (Å) | $\Delta E_{\text{relative}}^a$ ,<br>(kJ/mol) | I. E.,<br>(kJ/mol) |
|---------------------------|---------------|--------------|----------------------------------------------|--------------------|
| Conformer 1               | O11-H31...N50 | 1.86         | 0.00                                         | -114.94            |
|                           | O23-H43...N44 | 1.79         |                                              |                    |
| Conformer 2               | O23-H43...N44 | 1.86         | 0.33                                         | -92.71             |
|                           | O13-H32...N50 | 1.87         |                                              |                    |
| Conformer 3               | O13-H32...N44 | 1.84         | 0.73                                         | -49.82             |
| Conformer 4               | O23-H43...N50 | 1.82         | 0.80                                         |                    |
|                           | O11-H31...N44 | 1.88         |                                              |                    |
| Conformer 5               | O23-H43...N50 | 1.78         | 5.75                                         | -45.78             |
| Conformer 6               | O11-H31...N50 | 1.84         | 6.70                                         | -60.67             |
|                           | N50-H63...O8  | 2.20         |                                              |                    |
| Conformer 7               | N44-H52...O11 | 2.26         | 9.13                                         | -48.87             |
| Conformer 8               | -             | -            | 14.02                                        | -29.47             |
| Conformer 9               | O23-H43...N50 | 1.86         | 18.96                                        | -50.62             |
| Conformer 10              | O23-H43...N44 | 1.78         | 27.77                                        | -43.33             |
| Conformer 11              | N44-H51...O8  | 2.19         | 47.39                                        | -18.45             |

$$^a \Delta E_{\text{relative}} \text{ (kJ/mol)} = (E_{\text{conformer1}} - E_{\text{conformer (1 to n)}}) \times 2625.5$$

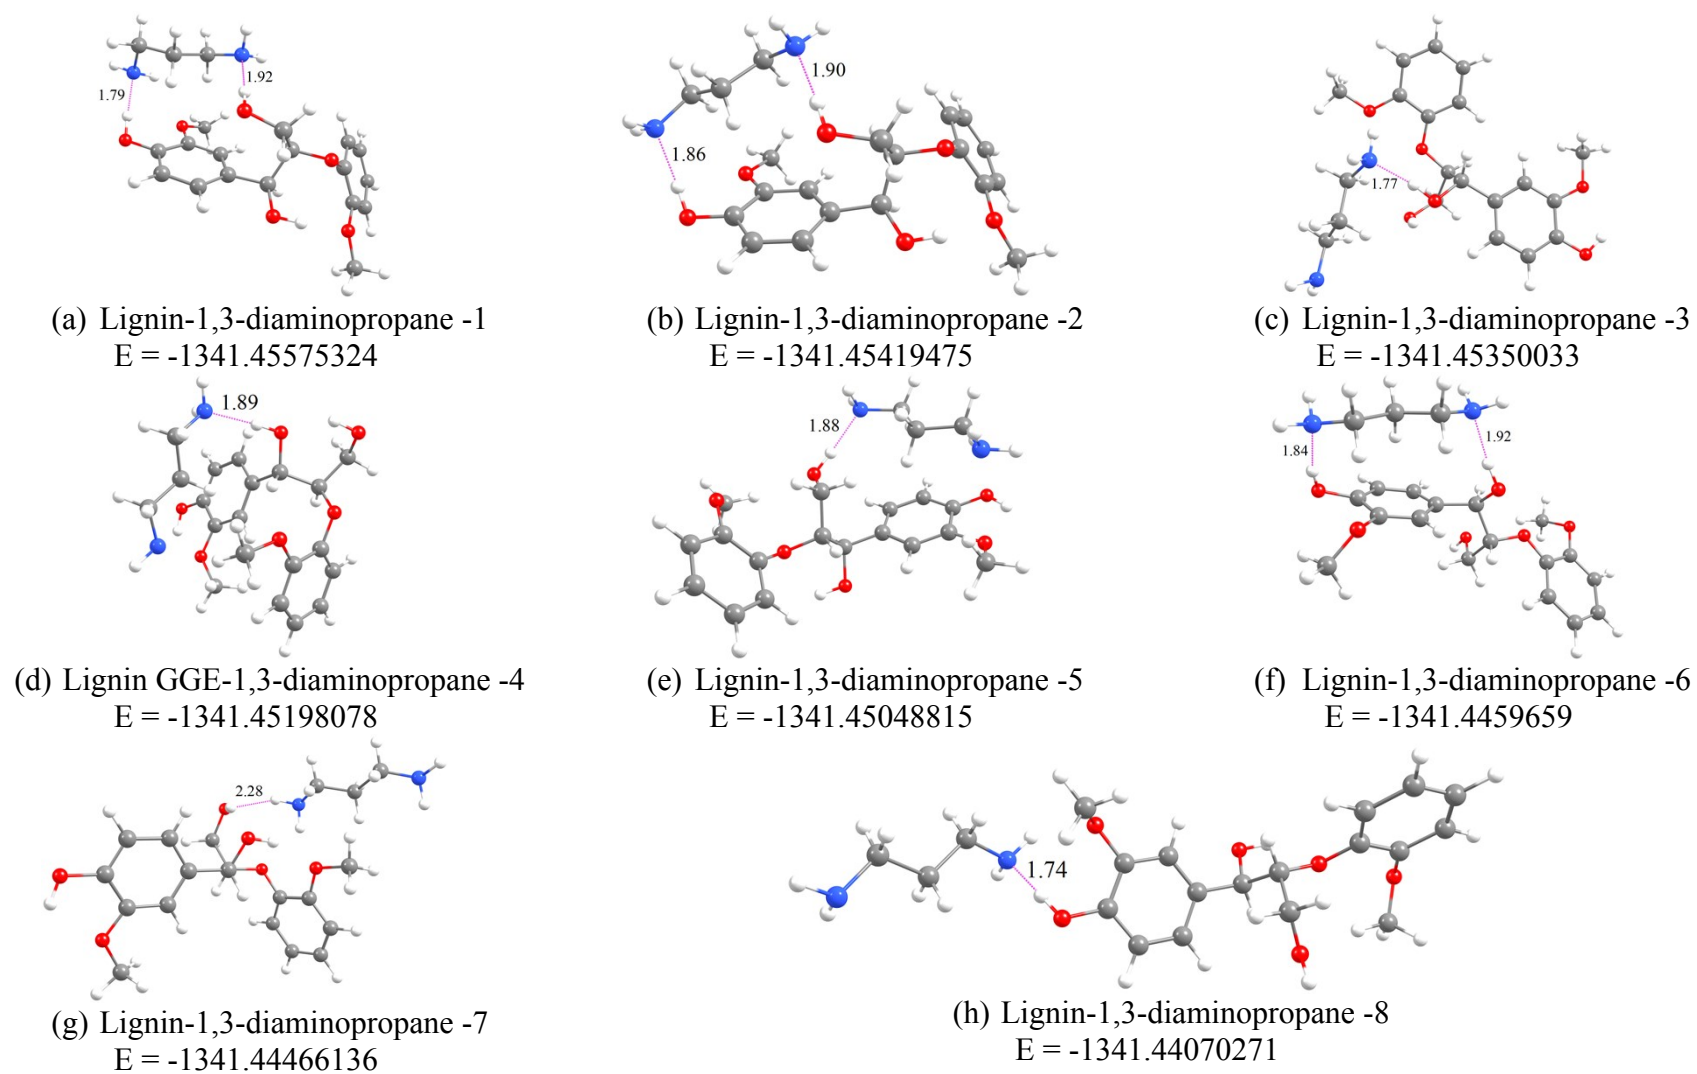

**Figure S15:** The optimized configurations of lignin-1,3-diaminopropane-n (n=1-8) at B3LYP-GD3BJ/6-311+g(d,p) level. The hydrogen bonds are indicated by dashed lines and bond distances are given in Å.

**Table S5:** Hydrogen bonds, relative optimized complex energy ( $\Delta E_{\text{relative}}$ ), and Fi-SAFT predicted interaction energy (I.E.) between the different conformers of lignin and 1,3-diaminopropane

| Lignin–1,3-diaminopropane | H-bonding     | Distance (Å) | $\Delta E_{\text{relative}}^a$ , (kJ/mol) | I. E., (kJ/mol) |
|---------------------------|---------------|--------------|-------------------------------------------|-----------------|
| Conformer 1               | O23-H43...N48 | 1.79         | 0.00                                      | -90.26          |
|                           | O13-H32...N44 | 1.92         |                                           |                 |
| Conformer 2               | O23-H43...N48 | 1.86         | 4.09                                      | -83.02          |
|                           | O13-H32...N44 | 1.90         |                                           |                 |
| Conformer 3               | O11-H31...N44 | 1.77         | 5.91                                      | -74.70          |
| Conformer 4               | O11-H31...N48 | 1.89         | 9.90                                      |                 |
| Conformer 5               | O13-H32...N48 | 1.88         | 13.82                                     | -65.86          |
| Conformer 6               | O23-H43...N44 | 1.84         | 25.68                                     | -98.69          |
|                           | O11-H31...N48 | 1.92         |                                           |                 |
| Conformer 7               | N48-H55...O13 | 2.28         | 29.11                                     | -26.17          |
| Conformer 8               | O23-H43...N48 | 1.74         | 39.50                                     | -57.90          |

$$^a \Delta E_{\text{relative}} \text{ (kJ/mol)} = (E_{\text{conformer1}} - E_{\text{conformer (1 to n)}}) \times 2625.5$$

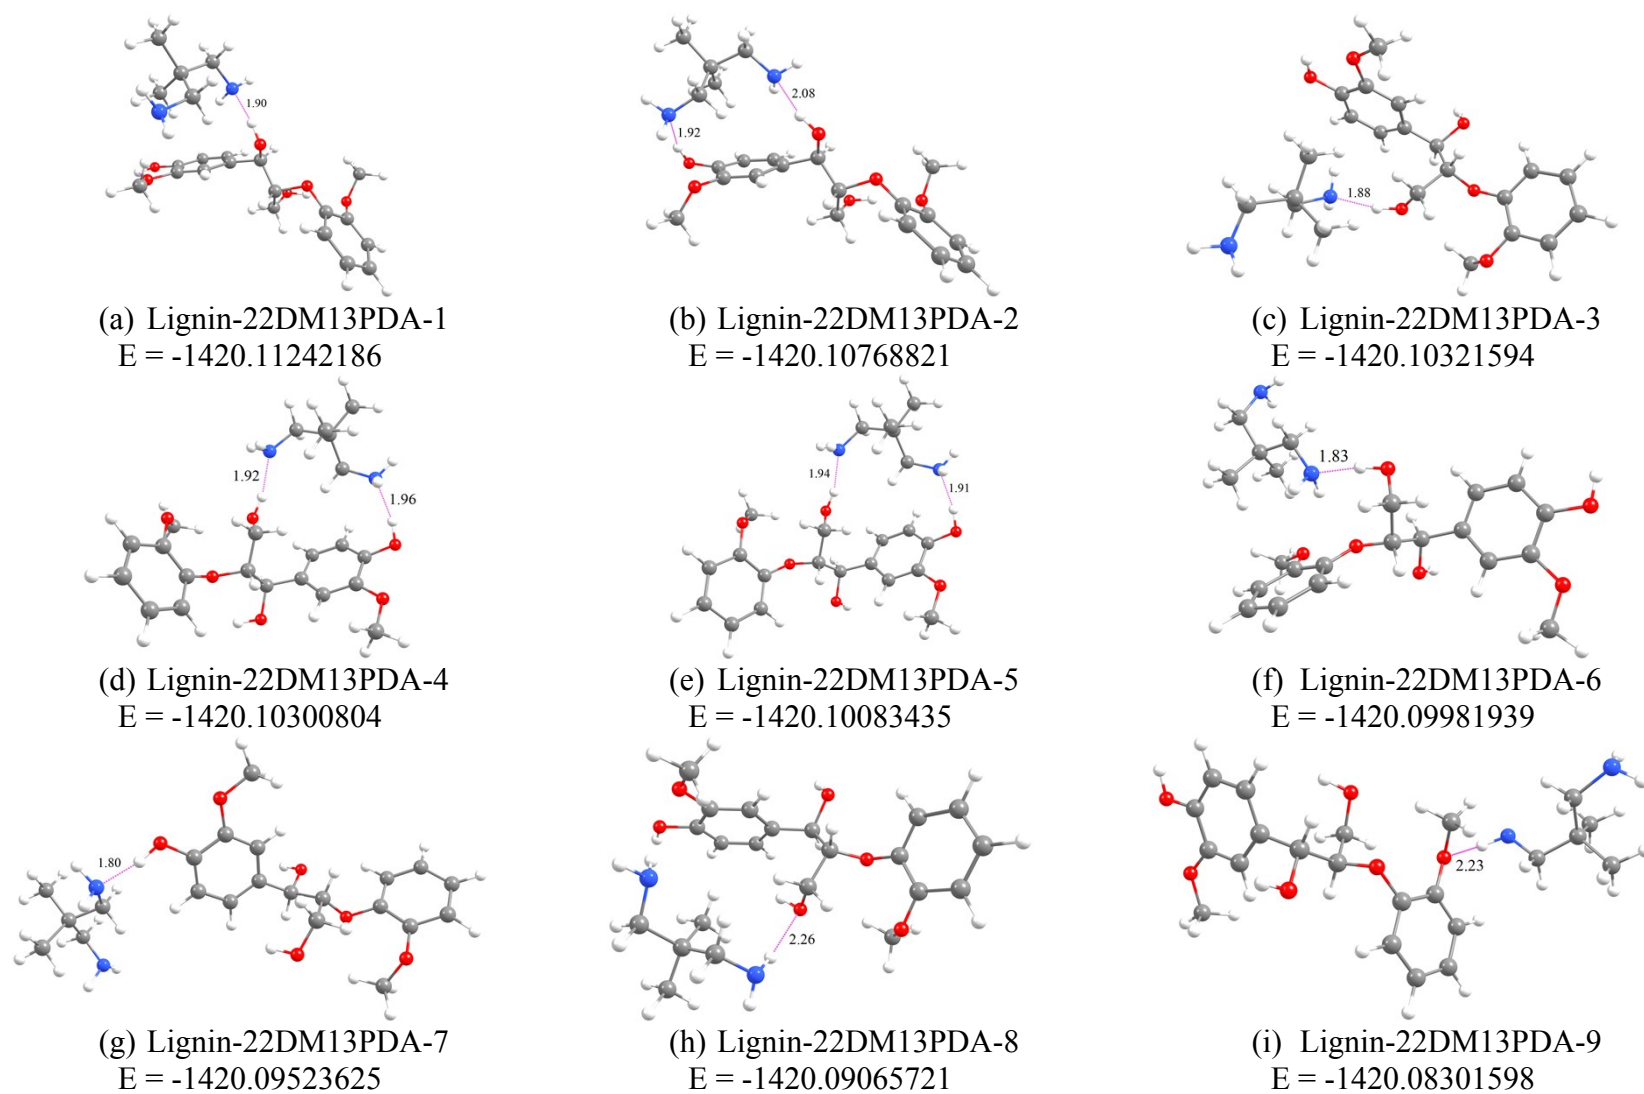

**Figure S16:** The optimized configurations of lignin-2,2-dimethyl-1,3-propanediamine (22DM13PDA)-n (n=1-8) at B3LYP-GD3BJ/6-311+g(d,p) level. The hydrogen bonds are indicated by dashed lines and bond distances are given in Å.

**Table S6:** Hydrogen bonds, relative optimized complex energy ( $\Delta E_{\text{relative}}$ ), and Fi-SAFT predicted interaction energy (I.E.) between the different conformers of lignin and 2,2-dimethyl-1,3-propanediamine (2,2-DM-1,3-PDA)

| Lignin-(2,2-dimethyl-1,3-propanediamine) | H-bonding     | Distance (Å) | $\Delta E_{\text{relative}}^a$ , (kJ/mol) | I. E., (kJ/mol) |
|------------------------------------------|---------------|--------------|-------------------------------------------|-----------------|
| Conformer 1                              | O11-H31...N44 | 1.90         | 0.00                                      | -60.58          |
| Conformer 2                              | O23-H43...N48 | 1.92         | 12.42                                     | -90.16          |
|                                          | N48-H55...O20 | 2.28         |                                           |                 |
|                                          | O11-H31...N44 | 2.08         |                                           |                 |
| Conformer 3                              | O13-H32...N48 | 1.88         | 24.16                                     | -56.03          |
| Conformer 4                              | O13-H32...N44 | 1.92         | 24.70                                     | -80.24          |
|                                          | O23-H43...N48 | 1.96         |                                           |                 |
| Conformer 5                              | O13-H32...N44 | 1.94         | 30.41                                     | -80.93          |
|                                          | O23-H43...N48 | 1.91         |                                           |                 |
| Conformer 6                              | O13-H32...N48 | 1.83         | 33.07                                     | -64.82          |
| Conformer 7                              | O23-H43...N48 | 1.80         | 45.10                                     | -56.20          |
| Conformer 8                              | N48-H55...O13 | 2.26         | 57.12                                     | -37.61          |
| Conformer 9                              | N44-H61...O8  | 2.23         | 77.17                                     | -20.48          |

<sup>a</sup>  $\Delta E_{\text{relative}}$  (kJ/mol) =  $(E_{\text{conformer1}} - E_{\text{conformer (1 to n)}}) \times 2625.5$

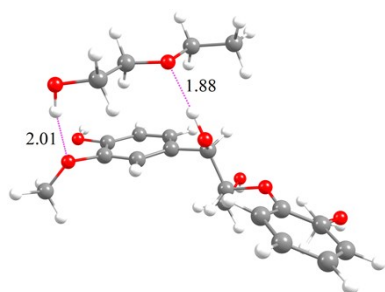

(a) Lignin-2-ethoxy ethanol-1  
E = -1420.50316587

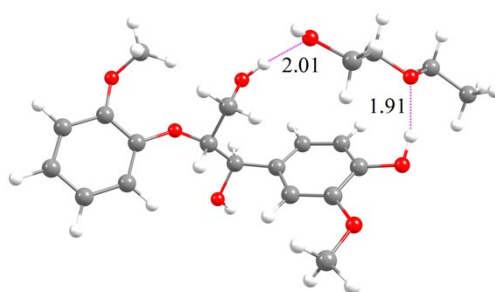

(b) Lignin-2-ethoxy ethanol-2  
E = -1420.5006484

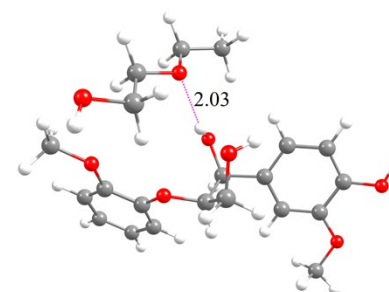

(c) Lignin-2-ethoxy ethanol-3  
E = -1420.49843929

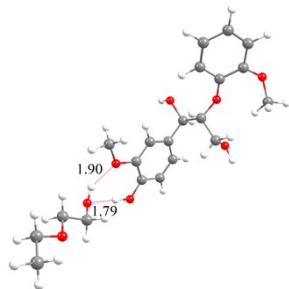

(d) Lignin-2-ethoxy ethanol-4  
E = -1420.49841527

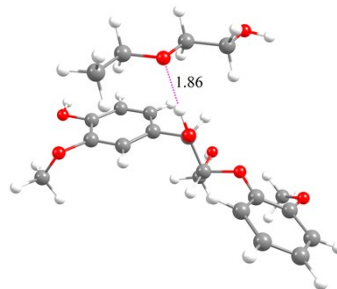

(e) Lignin-2-ethoxy ethanol-5  
E = -1420.49726424

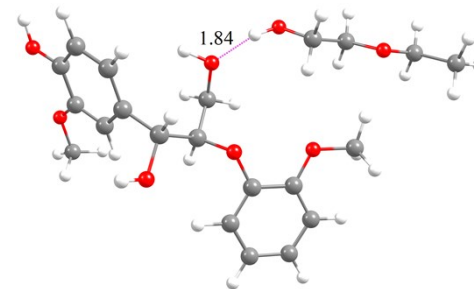

(f) Lignin-2-ethoxy ethanol-6  
E = -1420.4965459

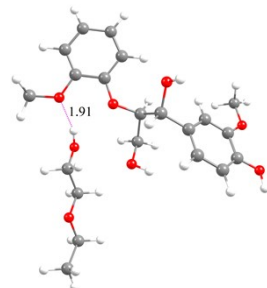

(g) Lignin-2-ethoxy ethanol-7  
E = -1420.49530012

**Figure S17.** The optimized configurations of lignin-2-ethoxy ethanol- $n$  ( $n=1-7$ ) at B3LYP-GD3BJ/6-311+g(d,p) level. The hydrogen bonds are indicated by dashed lines and bond distances are given in Å.



**Table S7:** Hydrogen bonds, relative optimized complex energy ( $\Delta E_{\text{relative}}$ ), and Fi-SAFT predicted interaction energy (I.E.) between the different conformers of lignin and 2-ethoxy ethanol

| Lignin–2-ethoxy ethanol | H-bonding     | Distance (Å) | $\Delta E_{\text{relative}}^a$ , (kJ/mol) | I. E., (kJ/mol) |
|-------------------------|---------------|--------------|-------------------------------------------|-----------------|
| Conformer 1             | O11-H31...O46 | 1.88         | 0.00                                      | -69.48          |
|                         | O50-H59...O20 | 2.01         |                                           |                 |
| Conformer 2             | O23-H43...O46 | 1.91         | 6.61                                      | -66.11          |
|                         | O13-H32...O57 | 2.01         |                                           |                 |
| Conformer 3             | O11-H31...O46 | 2.03         | 12.40                                     | -45.90          |
| Conformer 4             | O23-H43...O57 | 1.79         | 12.47                                     | -38.10          |
|                         | O57-H59...O20 | 1.90         |                                           |                 |
| Conformer 5             | O11-H31...O46 | 1.86         | 15.49                                     | -51.66          |
| Conformer 6             | O57-H59...O13 | 1.84         | 17.37                                     | -43.75          |
| Conformer 7             | O57-H59...O8  | 1.91         | 20.64                                     | -42.46          |

<sup>a</sup>  $\Delta E_{\text{relative}}$  (kJ/mol) =  $(E_{\text{conformer1}} - E_{\text{conformer (1 to n)}}) \times 2625.5$

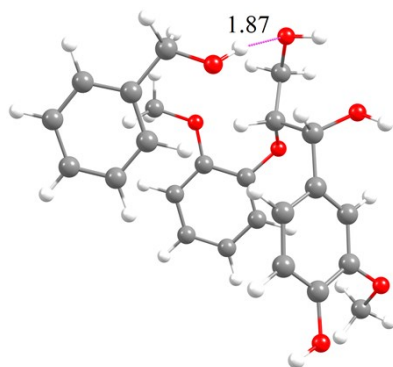

(a) Lignin-benzyl alcohol-1  
E = -1458.41067599

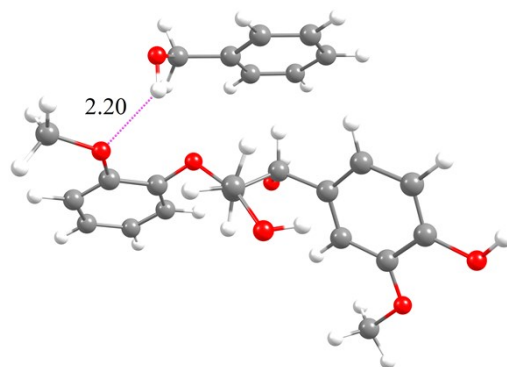

(b) Lignin-benzyl alcohol-2  
E = -1458.41057868

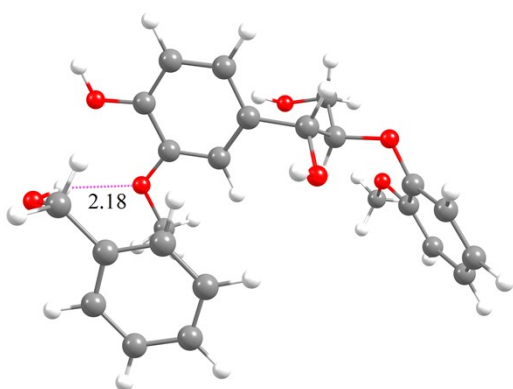

(c) Lignin-benzyl alcohol-3  
E = -1458.40667195

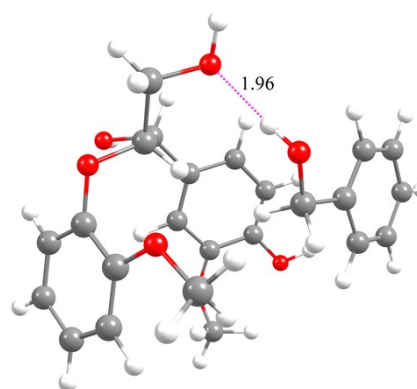

(d) Lignin-benzyl alcohol-4  
E = -1458.40262718

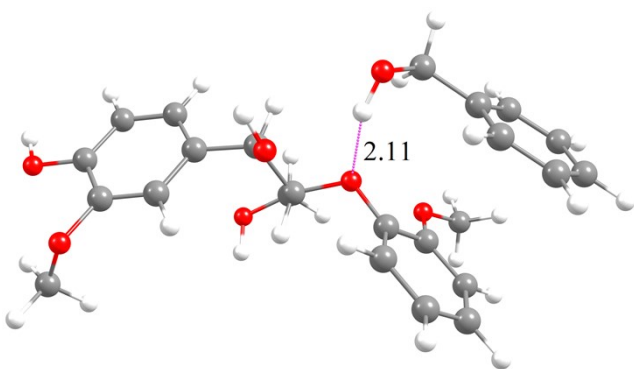

(e) Lignin-benzyl alcohol-5  
E = -1458.40145676

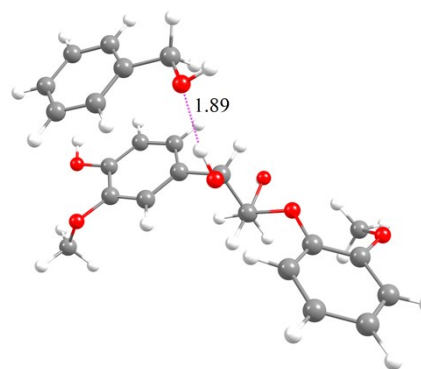

(f) Lignin-benzyl alcohol-6  
E = -1458.39798136

**Figure S18:** The optimized configurations of lignin-benzyl alcohol-n (n=1-6) at B3LYP-GD3BJ/6-311+g(d,p) level. The hydrogen bonds are indicated by dashed lines and bond distances are given in Å.

**Table S8:** Hydrogen bonds, relative optimized complex energy ( $\Delta E_{\text{relative}}$ ), and Fi-SAFT predicted interaction energy (I.E.) between the different conformers of lignin and benzyl alcohol

| Lignin–benzyl alcohol | H-bonding     | Distance (Å) | $\Delta E_{\text{relative}}^{\text{a}}$ , (kJ/mol) | I. E., (kJ/mol) |
|-----------------------|---------------|--------------|----------------------------------------------------|-----------------|
| Conformer 1           | O51-H59...O13 | 1.87         | 0.00                                               | -65.90          |
| Conformer 2           | O51-H59...O8  | 2.20         | 0.26                                               | -67.40          |
| Conformer 3           | O51-H59...O20 | 2.18         | 10.51                                              | -50.42          |
| Conformer 4           | O51-H59...O13 | 1.96         | 21.12                                              | -65.16          |
| Conformer 5           | O51-H59...O1  | 2.11         | 24.19                                              | -59.60          |
| Conformer 6           | O11-H31...O51 | 1.89         | 33.31                                              | -55.21          |

<sup>a</sup>  $\Delta E_{\text{relative}}$  (kJ/mol) =  $(E_{\text{conformer1}} - E_{\text{conformer (1 to n)}}) \times 2625.5$

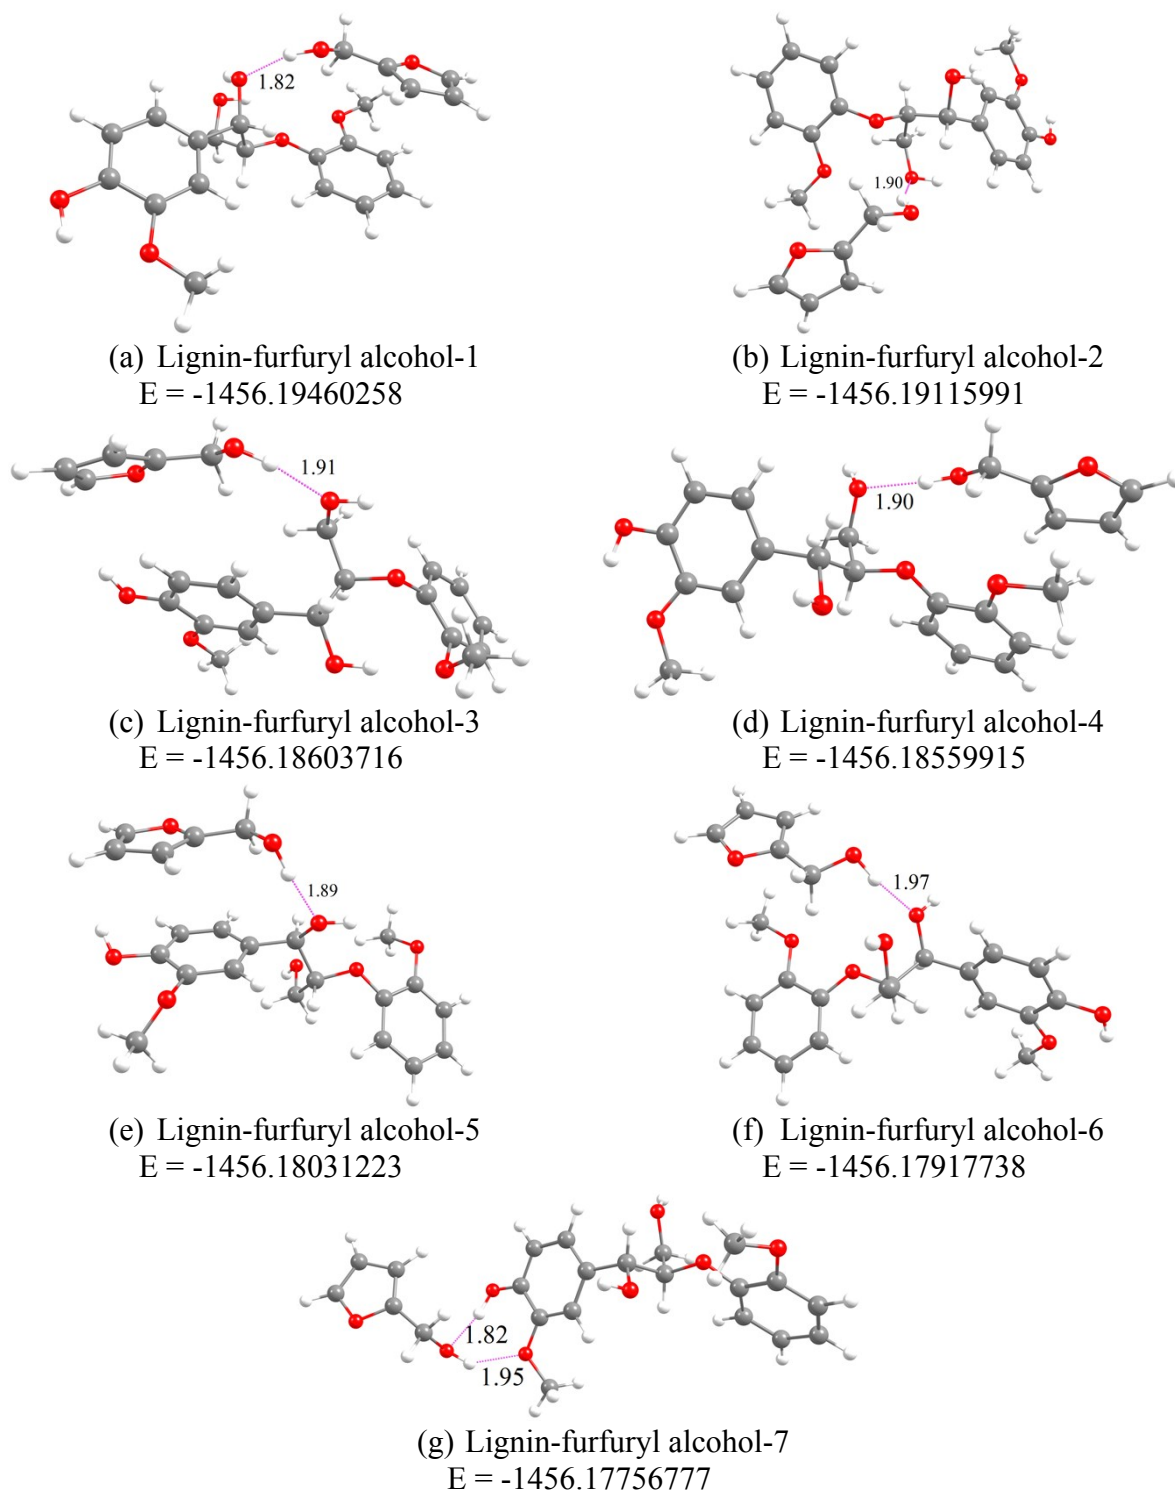

**Figure S19:** The optimized configurations of lignin-furfuryl alcohol- $n$  ( $n=1-7$ ) at B3LYP-GD3BJ/6-311+g(d,p) level. The hydrogen bonds are indicated by dashed lines and bond distances are given in Å.

**Table S9:** Hydrogen bonds, relative optimized complex energy ( $\Delta E_{\text{relative}}$ ), and Fi-SAFT predicted interaction energy (I.E.) between the different conformers of lignin and furfuryl alcohol

| Lignin–furfuryl alcohol | H-bonding     | Distance (Å) | $\Delta E_{\text{relative}}^a$ , (kJ/mol) | I. E., (kJ/mol) |
|-------------------------|---------------|--------------|-------------------------------------------|-----------------|
| Conformer 1             | O50-H56...O11 | 1.82         | 0.00                                      | -63.51          |
| Conformer 2             | O50-H56...O13 | 1.90         | 9.03                                      | -64.35          |
| Conformer 3             | O50-H56...O13 | 1.91         | 22.48                                     | -53.37          |
| Conformer 4             | O50-H56...O13 | 1.90         | 23.63                                     | -59.64          |
| Conformer 5             | O50-H56...O11 | 1.89         | 37.50                                     | -60.56          |
| Conformer 6             | O50-H56...O11 | 1.97         | 40.48                                     | -66.95          |
| Conformer 7             | O23-H43...O50 | 1.82         | 44.70                                     | -44.01          |
|                         | O50-H56...O20 | 1.95         |                                           |                 |

<sup>a</sup>  $\Delta E_{\text{relative}}$  (kJ/mol) =  $(E_{\text{conformer1}} - E_{\text{conformer (1 to n)}}) \times 2625.5$

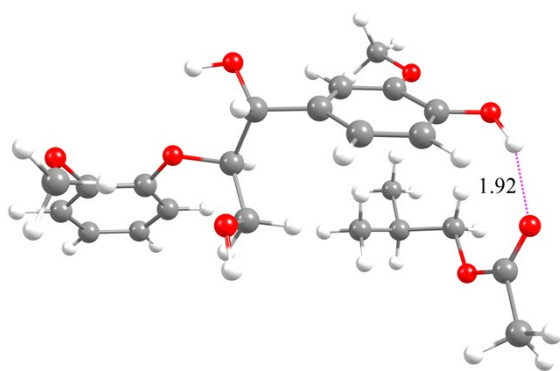

(a) Lignin-isobutyl acetate -1  
E = -1497.98931539

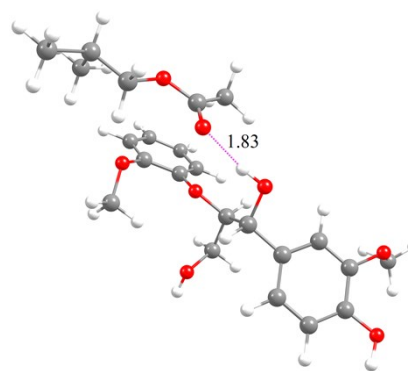

(b) Lignin-isobutyl acetate -2  
E = -1497.98696768

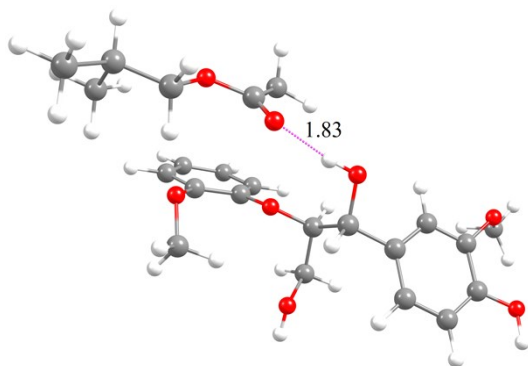

(c) Lignin-isobutyl acetate -3  
E = -1497.98696767

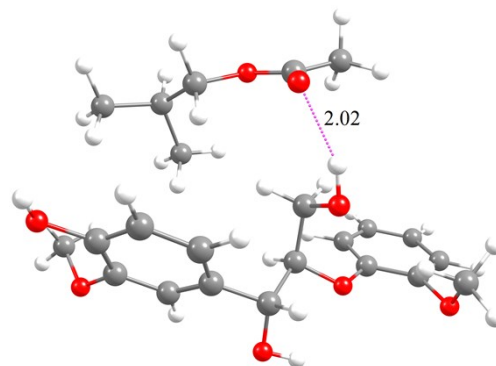

(d) Lignin-isobutyl acetate -4  
E = -1497.98661456

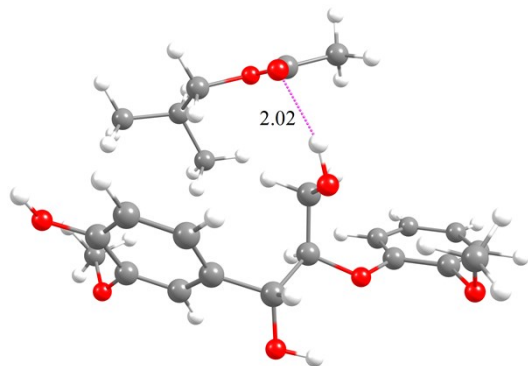

(e) Lignin-isobutyl acetate -5  
E = -1497.98661456

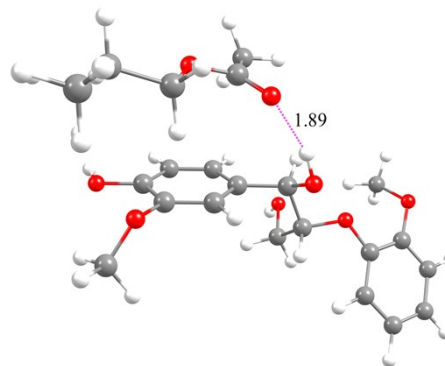

(f) Lignin-isobutyl acetate -6  
E = -1497.98247558

**Figure S20:** The optimized configurations of lignin-isobutyl acetate -n (n=1-6) at B3LYP-GD3BJ/6-311+g(d,p) level. The hydrogen bonds are indicated by dashed lines and bond distances are given in Å.

**Table S10:** Hydrogen bonds, relative optimized complex energy ( $\Delta E_{\text{relative}}$ ), and Fi-SAFT predicted interaction energy (I.E.) between the different conformers of lignin and isobutyl acetate

| Lignin–isobutyl acetate | H-bonding     | Distance (Å) | $\Delta E_{\text{relative}}^a$ ,<br>(kJ/mol) | I. E.,<br>(kJ/mol) |
|-------------------------|---------------|--------------|----------------------------------------------|--------------------|
| Conformer 1             | O23-H43...O46 | 1.92         | 0.00                                         | -56.61             |
| Conformer 2             | O11-H31...O46 | 1.83         | 6.16                                         | -53.87             |
| Conformer 3             | O11-H31...O46 | 1.83         | 6.16                                         | -53.87             |
| Conformer 4             | O13-H32...O46 | 2.02         | 7.09                                         | -49.05             |
| Conformer 5             | O13-H32...O46 | 2.02         | 7.09                                         | -49.05             |
| Conformer 6             | O11-H31...O46 | 1.89         | 17.95                                        | -52.81             |

<sup>a</sup>  $\Delta E_{\text{relative}}$  (kJ/mol) =  $(E_{\text{conformer1}} - E_{\text{conformer (1 to n)}}) \times 2625.5$

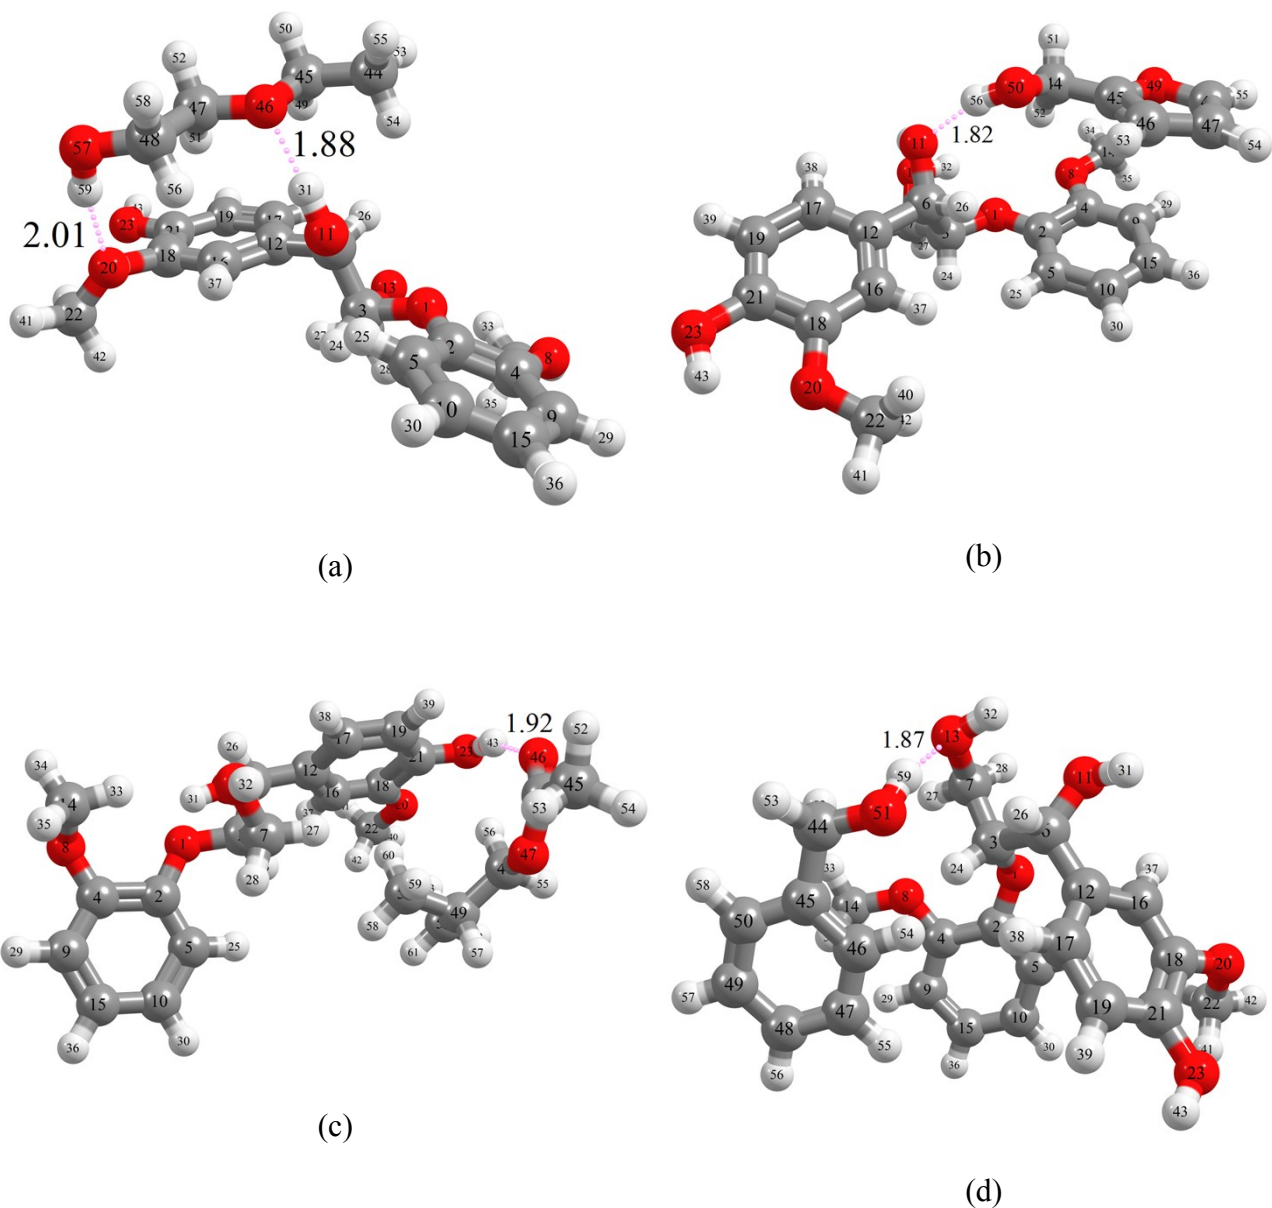

**Fig. S21** Optimized geometries for lignin GGE–organic solvents (a) 2-ethoxyethanol, (b) furfuryl alcohol, (c) isobutyl acetate, and (d) benzyl alcohol. The H-bonds are indicated by dotted lines, the bond lengths are in Angstrom ( $\text{\AA}$ ) and given with corresponding atom numbers. The color scheme used for different atoms is C (gray), O (red), and H (white), respectively.



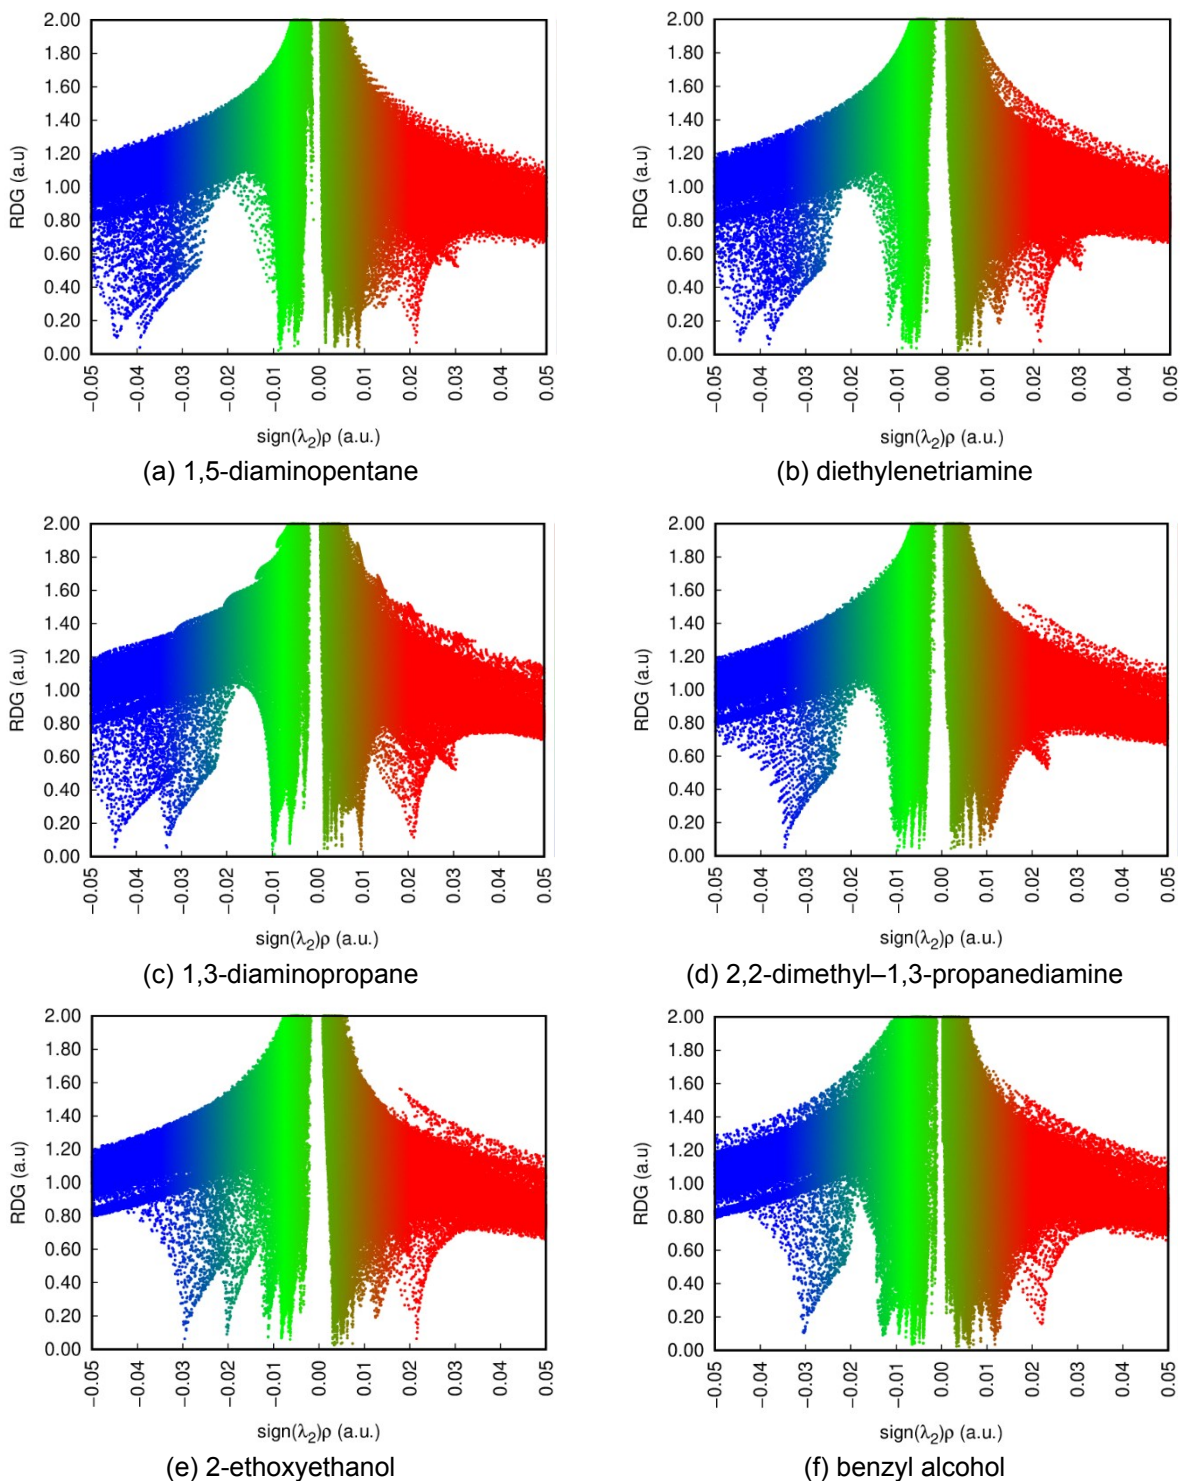

**Fig. S22** RDG scatter plots (isovalue 0.5 a.u.) of lignin-amine/organic solvents. The RDG scatters are colored on a blue-green-red scale according to values of  $\text{sign}(\lambda_2)\rho(r)$ , ranging from -0.045 to 0.025. Blue indicates strong attractive interactions, green indicates the vdW interaction, and red indicated steric repulsions

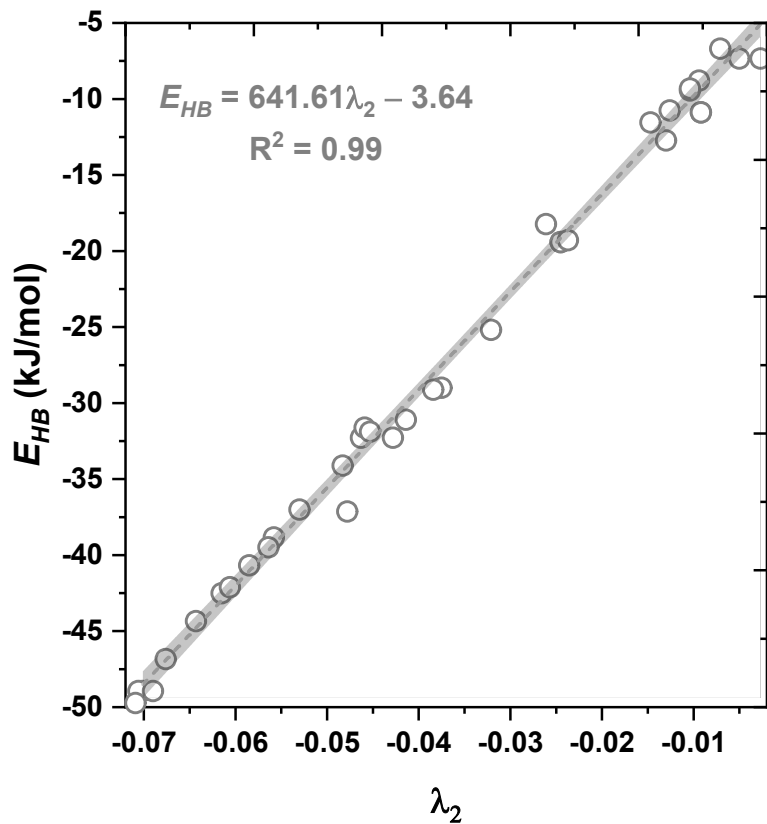

**Fig. S23** Correlation between QTAIM-based Hessian second eigenvalue ( $\lambda_2$ ) and H-bonding energies ( $E_{HB}$ ) of lignin-amine/organic solvent systems.

Cartesian coordinates (in Å) and calculated lowest energy conformers of lignin-amine/organic solvent complexes (most stable energy conformer) optimized at B3LYP-GD3BJ/6-311+g(d,p) level of theory and basis set.

**Lignin–Spermidine-1**

72

Energy: -1554.13158473

|   |          |          |          |
|---|----------|----------|----------|
| O | -2.09189 | -1.61079 | -0.54387 |
| C | -2.90623 | -1.24205 | 0.48611  |
| C | -0.71601 | -1.19588 | -0.56057 |
| C | -4.26208 | -1.00617 | 0.15950  |
| C | -2.48940 | -1.11268 | 1.80819  |
| C | 0.17840  | -2.42957 | -0.37878 |
| C | -0.51576 | -0.46095 | -1.90145 |
| O | -4.59275 | -1.15091 | -1.15741 |
| C | -5.15237 | -0.61618 | 1.15836  |
| C | -3.38773 | -0.71157 | 2.80027  |
| O | -0.16042 | -2.98376 | 0.90117  |
| C | 1.64754  | -2.08528 | -0.46622 |
| O | 0.67327  | 0.29068  | -1.98014 |
| C | -5.96672 | -1.05242 | -1.52556 |
| C | -4.71410 | -0.46076 | 2.47658  |
| C | 2.26973  | -1.43569 | 0.60299  |
| C | 2.39032  | -2.34360 | -1.61723 |
| C | 3.58777  | -1.01384 | 0.50679  |
| C | 3.70379  | -1.89865 | -1.72989 |
| O | 4.15680  | -0.34721 | 1.57657  |
| C | 4.30926  | -1.19513 | -0.68920 |
| C | 5.19297  | -1.07956 | 2.24613  |
| O | 5.57519  | -0.71937 | -0.83893 |
| H | -0.51914 | -0.49665 | 0.25766  |
| H | -1.46802 | -1.36200 | 2.05851  |
| H | -0.08707 | -3.13949 | -1.17348 |
| H | -0.49672 | -1.19157 | -2.71561 |
| H | -1.41057 | 0.15801  | -2.05072 |
| H | -6.18646 | -0.41462 | 0.91408  |
| H | -3.04368 | -0.61215 | 3.82314  |
| H | 0.43275  | -3.72308 | 1.07059  |
| H | 0.64711  | 1.03376  | -1.33516 |
| H | -6.35182 | -0.04046 | -1.36326 |
| H | -6.00007 | -1.27763 | -2.59029 |
| H | -6.57489 | -1.78028 | -0.97767 |
| H | -5.41838 | -0.14911 | 3.23896  |
| H | 1.92561  | -2.85307 | -2.45448 |

**Lignin–1,5-diaminopentane-1**

64

Energy: -1420.11676348

|   |          |          |          |
|---|----------|----------|----------|
| O | -2.58256 | -1.48202 | 0.12276  |
| C | -3.20120 | -0.44034 | 0.78952  |
| C | -1.24958 | -1.21718 | -0.38427 |
| C | -4.44611 | 0.05746  | 0.35583  |
| C | -2.58818 | 0.11899  | 1.91617  |
| C | -0.35472 | -2.40415 | 0.04505  |
| C | -1.30826 | -1.01142 | -1.89966 |
| O | -5.19060 | -0.37576 | -0.68875 |
| C | -4.99896 | 1.14726  | 1.04756  |
| C | -3.14819 | 1.19996  | 2.58863  |
| O | -0.57970 | -2.69989 | 1.42074  |
| C | 1.10845  | -2.07791 | -0.15552 |
| O | -2.25812 | -0.05027 | -2.30182 |
| C | -4.93942 | -1.62397 | -1.35172 |
| C | -4.36198 | 1.72228  | 2.13847  |
| C | 1.83099  | -1.43641 | 0.85316  |
| C | 1.74971  | -2.34828 | -1.36615 |
| C | 3.14556  | -1.04236 | 0.64365  |
| C | 3.05480  | -1.92086 | -1.59402 |
| O | 3.82495  | -0.39540 | 1.66420  |
| C | 3.76185  | -1.23004 | -0.60827 |
| C | 4.84194  | -1.20346 | 2.27739  |
| O | 5.01117  | -0.77108 | -0.87584 |
| H | -0.87020 | -0.31181 | 0.09497  |
| H | -1.64847 | -0.30915 | 2.24618  |
| H | -0.62216 | -3.27562 | -0.56987 |
| H | -0.29799 | -0.76012 | -2.24981 |
| H | -1.59394 | -1.95514 | -2.37693 |
| H | -5.94859 | 1.52635  | 0.68873  |
| H | -2.64953 | 1.61827  | 3.45471  |
| H | -1.53783 | -2.73671 | 1.53540  |
| H | -2.14350 | 0.79343  | -1.80294 |
| H | -4.81614 | -2.43379 | -0.62998 |
| H | -5.82954 | -1.79844 | -1.95618 |
| H | -4.05943 | -1.54395 | -1.98577 |
| H | -4.81904 | 2.56530  | 2.64371  |
| H | 1.37888  | -1.25072 | 1.81898  |

|   |          |          |          |   |          |          |          |
|---|----------|----------|----------|---|----------|----------|----------|
| H | 4.27323  | -2.05243 | -2.63873 | H | 1.21894  | -2.87393 | -2.15309 |
| H | 4.78461  | -1.99048 | 2.69744  | H | 3.54269  | -2.08980 | -2.54663 |
| H | 5.57381  | -0.42568 | 3.03149  | H | 4.39522  | -2.08266 | 2.75300  |
| H | 6.00005  | -1.33984 | 1.55602  | H | 5.31591  | -0.58162 | 3.03795  |
| H | 5.61418  | 0.23099  | -0.54256 | H | 5.58575  | -1.52068 | 1.54052  |
| N | 5.65143  | 2.01799  | -0.30105 | H | 5.12634  | 0.14860  | -0.50437 |
| C | 4.49572  | 2.54124  | 0.46025  | N | 5.19844  | 1.82395  | 0.11791  |
| C | 3.19227  | 2.35099  | -0.31766 | C | 4.17136  | 2.76848  | -0.37580 |
| C | 1.97249  | 2.47062  | 0.59615  | C | 2.78751  | 2.12925  | -0.29638 |
| N | 0.72539  | 2.49866  | -0.17663 | C | 1.63584  | 3.05269  | -0.69821 |
| C | -0.48964 | 2.55539  | 0.64821  | C | 0.28932  | 2.32976  | -0.59325 |
| C | -1.72602 | 2.78885  | -0.21727 | C | -0.91108 | 3.18084  | -0.99968 |
| C | -3.03943 | 2.55786  | 0.53077  | N | -2.15307 | 2.39626  | -0.88109 |
| C | -4.28986 | 2.80210  | -0.33255 | H | 6.12323  | 2.24164  | 0.07595  |
| N | -4.37757 | 2.05091  | -1.58942 | H | 5.00794  | 1.58801  | 1.08909  |
| H | 5.70082  | 2.45352  | -1.21915 | H | 4.41192  | 3.01332  | -1.41513 |
| H | 6.52062  | 2.24665  | 0.17347  | H | 4.17662  | 3.71180  | 0.18935  |
| H | 4.61731  | 3.60275  | 0.71759  | H | 2.62249  | 1.77326  | 0.72670  |
| H | 4.44536  | 1.97186  | 1.38936  | H | 2.77262  | 1.23903  | -0.93083 |
| H | -1.69949 | 3.81035  | -0.62211 | H | 1.78258  | 3.40715  | -1.72648 |
| H | -1.67588 | 2.11435  | -1.07704 | H | 1.62936  | 3.94527  | -0.05977 |
| H | -3.06322 | 1.52978  | 0.90555  | H | 0.14732  | 1.98143  | 0.43788  |
| H | -3.08997 | 3.20981  | 1.41230  | H | 0.31198  | 1.43248  | -1.22059 |
| H | -4.36599 | 3.86689  | -0.58092 | H | -0.80588 | 3.48435  | -2.04617 |
| H | -5.17310 | 2.56169  | 0.26812  | H | -0.93309 | 4.10143  | -0.39764 |
| H | -3.72618 | 2.41099  | -2.27772 | H | -2.36027 | 2.18997  | 0.09370  |
| H | -4.15225 | 1.06978  | -1.45554 | H | -2.95085 | 2.91352  | -1.23767 |
| H | 3.17877  | 1.36971  | -0.79808 |   |          |          |          |
| H | 3.12944  | 3.09796  | -1.12039 |   |          |          |          |
| H | 2.06452  | 3.35965  | 1.24375  |   |          |          |          |
| H | 1.94051  | 1.59885  | 1.25728  |   |          |          |          |
| H | -0.58205 | 1.59940  | 1.17548  |   |          |          |          |
| H | -0.42071 | 3.33537  | 1.42440  |   |          |          |          |
| H | 0.73910  | 3.30238  | -0.80072 |   |          |          |          |
| H | 1.73184  | -1.25064 | 1.52549  |   |          |          |          |

### Lignin–diethylenetriamine-1

63

Energy: -1436.13906674

|   |         |          |          |
|---|---------|----------|----------|
| O | 3.11245 | -0.08582 | -0.53046 |
| C | 4.01847 | 0.19851  | 0.45660  |
| C | 1.86721 | -0.72272 | -0.20858 |
| C | 5.38523 | 0.07454  | 0.13421  |
| C | 3.64919 | 0.66993  | 1.71887  |

### Lignin–1,3-diaminopropane-1

58

Energy: -1341.45575324

|   |          |         |          |
|---|----------|---------|----------|
| O | -2.68377 | 0.33035 | -1.44402 |
| C | -3.44234 | 0.88154 | -0.44463 |
| C | -1.28838 | 0.06423 | -1.14650 |
| C | -4.43184 | 0.09110 | 0.17421  |
| C | -3.29072 | 2.21164 | -0.07046 |

|   |          |          |          |   |          |          |          |
|---|----------|----------|----------|---|----------|----------|----------|
| C | 0.72555  | 0.24948  | -0.55217 | C | -1.20285 | -1.10064 | -0.13078 |
| C | 1.81018  | -2.05254 | -0.94634 | C | -0.64023 | -0.20069 | -2.51067 |
| O | 5.85076  | -0.29361 | -1.10099 | O | -4.50946 | -1.20675 | -0.24822 |
| C | 6.34336  | 0.41890  | 1.08836  | C | -5.24690 | 0.65494  | 1.15647  |
| C | 4.61866  | 0.99709  | 2.66428  | C | -4.10122 | 2.77243  | 0.91766  |
| O | 0.83470  | 1.32956  | 0.36067  | O | -1.80979 | -2.26786 | -0.66136 |
| C | -0.64265 | -0.41355 | -0.47983 | C | 0.22460  | -1.38113 | 0.27398  |
| O | 1.79525  | -1.80966 | -2.35534 | O | 0.76983  | -0.23795 | -2.46633 |
| C | 5.30733  | -1.46233 | -1.72739 | C | -5.42762 | -2.08342 | 0.40020  |
| C | 5.97033  | 0.87469  | 2.34964  | C | -5.07690 | 1.99135  | 1.52629  |
| C | -1.30842 | -0.51091 | 0.74407  | C | 0.88702  | -0.45269 | 1.08417  |
| C | -1.25933 | -0.93987 | -1.61741 | C | 0.92042  | -2.48897 | -0.19385 |
| C | -2.56160 | -1.10462 | 0.83197  | C | 2.23706  | -0.60250 | 1.38421  |
| C | -2.52248 | -1.52456 | -1.53975 | C | 2.27308  | -2.63668 | 0.09993  |
| O | -3.21352 | -1.13183 | 2.05055  | O | 2.94923  | 0.28859  | 2.16690  |
| C | -3.20174 | -1.59726 | -0.32135 | C | 2.96027  | -1.69482 | 0.86108  |
| C | -3.29774 | -2.43418 | 2.64614  | C | 2.21315  | 1.16339  | 3.00944  |
| O | -4.44848 | -2.13459 | -0.27535 | O | 4.28596  | -1.87089 | 1.10081  |
| H | 1.81655  | -0.94080 | 0.86360  | H | -0.83833 | 0.95804  | -0.69556 |
| H | 2.59932  | 0.83349  | 1.92186  | H | -2.53556 | 2.80279  | -0.57598 |
| H | 0.90433  | 0.58719  | -1.57959 | H | -1.75605 | -0.77383 | 0.76378  |
| H | 0.91010  | -2.59381 | -0.63267 | H | -0.98050 | -1.16982 | -2.87970 |
| H | 2.69148  | -2.63959 | -0.66117 | H | -1.01237 | 0.57172  | -3.19905 |
| H | 7.38562  | 0.31619  | 0.80998  | H | -6.01117 | 0.06292  | 1.64142  |
| H | 4.31258  | 1.36794  | 3.63587  | H | -3.97587 | 3.81169  | 1.19743  |
| H | 0.47217  | 2.13725  | -0.06792 | H | -2.73483 | -2.03949 | -0.83009 |
| H | 1.71426  | -2.65187 | -2.81193 | H | 1.11309  | 0.61350  | -2.12765 |
| H | 4.33538  | -1.26354 | -2.17832 | H | -5.28420 | -3.05747 | -0.06417 |
| H | 6.02968  | -1.74580 | -2.49395 | H | -5.21506 | -2.15651 | 1.47191  |
| H | 5.21662  | -2.28002 | -1.00219 | H | -6.46119 | -1.75597 | 0.24809  |
| H | 6.73099  | 1.13330  | 3.07720  | H | -5.71728 | 2.41418  | 2.29158  |
| H | -0.86559 | -0.09258 | 1.63976  | H | 0.33594  | 0.39505  | 1.47430  |
| H | -0.74631 | -0.88797 | -2.57121 | H | 0.41147  | -3.21223 | -0.81593 |
| H | -3.02094 | -1.90551 | -2.42370 | H | 2.83806  | -3.48007 | -0.27937 |
| H | -3.81430 | -3.13756 | 1.98665  | H | 1.68101  | 1.93291  | 2.43566  |
| H | -3.86223 | -2.31389 | 3.57092  | H | 2.94448  | 1.64703  | 3.65715  |
| H | -2.29625 | -2.81385 | 2.87718  | H | 1.49129  | 0.61200  | 3.62139  |
| H | -5.03720 | -1.58087 | 0.30921  | H | 4.75836  | -1.00205 | 1.01640  |
| N | -6.18676 | -0.29537 | 0.79823  | N | 1.95271  | 2.26398  | -1.63513 |
| C | -5.84617 | 0.81153  | -0.12740 | C | 3.17835  | 2.08414  | -0.83175 |
| C | -4.61980 | 1.59597  | 0.37183  | C | 4.05759  | 0.97816  | -1.42357 |
| N | -3.72310 | 1.91933  | -0.73718 | C | 5.47205  | 0.94678  | -0.83921 |
| C | -2.54741 | 2.68009  | -0.32102 | N | 5.48890  | 0.57329  | 0.58886  |
| C | -1.63782 | 2.94055  | -1.52008 | H | 3.76227  | 3.01507  | -0.75501 |
| N | -0.33871 | 3.47944  | -1.07016 | H | 2.86791  | 1.80794  | 0.17764  |
| H | -7.13397 | -0.62276 | 0.63275  | H | 3.56386  | 0.01116  | -1.29565 |

|   |          |         |          |   |         |         |          |
|---|----------|---------|----------|---|---------|---------|----------|
| H | -6.13902 | 0.00810 | 1.76650  | H | 4.15168 | 1.14430 | -2.50354 |
| H | -6.68870 | 1.49378 | -0.28759 | H | 6.06026 | 0.19825 | -1.37674 |
| H | -5.61259 | 0.36182 | -1.09614 | H | 5.95179 | 1.92208 | -1.01471 |
| H | -4.11430 | 1.01278 | 1.15637  | H | 4.89743 | 1.17954 | 1.14928  |
| H | -4.93985 | 2.53563 | 0.83508  | H | 6.43022 | 0.63534 | 0.96435  |
| H | -3.40503 | 1.04476 | -1.14954 | H | 1.32514 | 2.92473 | -1.18699 |
| H | -2.88449 | 3.63661 | 0.09888  | H | 2.18326 | 2.65352 | -2.54579 |
| H | -1.96650 | 2.16794 | 0.46142  |   |         |         |          |
| H | -1.43948 | 1.98978 | -2.02434 |   |         |         |          |
| H | -2.15445 | 3.59171 | -2.23568 |   |         |         |          |
| H | 0.25756  | 3.69400 | -1.86379 |   |         |         |          |
| H | -0.46684 | 4.34948 | -0.56030 |   |         |         |          |

### Lignin-22DM13PDA-1

64

Energy: -1420.11242186

|   |          |          |          |
|---|----------|----------|----------|
| O | 2.71136  | 0.66074  | -0.24024 |
| C | 3.87140  | 0.71117  | 0.48410  |
| C | 1.72612  | -0.32026 | 0.16246  |
| C | 5.06184  | 0.30953  | -0.14134 |
| C | 3.90933  | 1.18339  | 1.79544  |
| C | 0.48009  | -0.02110 | -0.67478 |
| C | 2.28795  | -1.73126 | -0.03505 |
| O | 5.02909  | -0.21011 | -1.42277 |
| C | 6.26990  | 0.37469  | 0.54559  |
| C | 5.12022  | 1.24275  | 2.48291  |
| O | 0.02351  | 1.27302  | -0.30376 |
| C | -0.59816 | -1.07525 | -0.47762 |
| O | 2.66342  | -1.98815 | -1.37980 |
| C | 4.82819  | 0.77011  | -2.45917 |
| C | 6.30047  | 0.83654  | 1.86081  |
| C | -1.39435 | -1.04124 | 0.67617  |
| C | -0.81239 | -2.07407 | -1.42330 |
| C | -2.39012 | -1.98963 | 0.86820  |
| C | -1.81135 | -3.03271 | -1.23275 |
| O | -3.25012 | -2.04823 | 1.93317  |
| C | -2.60299 | -2.99535 | -0.09500 |
| C | -3.20166 | -1.00362 | 2.90787  |
| O | -3.59262 | -3.91715 | 0.08048  |
| H | 1.47431  | -0.17484 | 1.22148  |
| H | 2.98402  | 1.50508  | 2.25896  |
| H | 0.79648  | -0.03609 | -1.72518 |
| H | 1.52572  | -2.46300 | 0.23667  |
| H | 3.13950  | -1.87049 | 0.64349  |

### Lignin-2-ethoxy ethanol-1

59

Energy: -1420.50316587

|   |          |          |          |
|---|----------|----------|----------|
| O | 2.67427  | -0.32913 | -0.41507 |
| C | 3.52709  | 0.20113  | 0.51943  |
| C | 1.42798  | -0.90705 | -0.00718 |
| C | 4.90909  | 0.04743  | 0.29123  |
| C | 3.08826  | 0.93630  | 1.62304  |
| C | 0.28577  | -0.07190 | -0.60510 |
| C | 1.41473  | -2.36788 | -0.43528 |
| O | 5.43985  | -0.58120 | -0.80474 |
| C | 5.81379  | 0.63090  | 1.17886  |
| C | 4.00502  | 1.50141  | 2.50670  |
| O | 0.33791  | 1.19025  | 0.04622  |
| C | -1.07561 | -0.72495 | -0.43864 |
| O | 1.42140  | -2.44013 | -1.86279 |
| C | 4.94968  | -1.87739 | -1.16603 |
| C | 5.37209  | 1.35243  | 2.28412  |
| C | -1.78090 | -0.56456 | 0.75458  |
| C | -1.67358 | -1.44238 | -1.47411 |
| C | -3.07168 | -1.05350 | 0.90524  |
| C | -2.95393 | -1.97155 | -1.32169 |
| O | -3.77614 | -0.68419 | 2.03052  |
| C | -3.67272 | -1.76697 | -0.14444 |
| C | -4.21306 | -1.73415 | 2.91033  |
| O | -4.95958 | -2.19966 | 0.03039  |
| H | 1.33537  | -0.88312 | 1.08384  |
| H | 2.02730  | 1.11012  | 1.74271  |
| H | 0.50006  | 0.03128  | -1.67537 |
| H | 0.51972  | -2.85023 | -0.02397 |
| H | 2.30155  | -2.85425 | -0.01307 |

|   |          |          |          |   |          |          |          |
|---|----------|----------|----------|---|----------|----------|----------|
| H | 7.17010  | 0.04596  | 0.03965  | H | 6.86989  | 0.49976  | 0.97469  |
| H | 5.14156  | 1.61104  | 3.50217  | H | 3.64574  | 2.07635  | 3.35242  |
| H | -0.73435 | 1.48036  | -0.89310 | H | -0.37476 | 1.75093  | -0.31202 |
| H | 3.46861  | -1.47722 | -1.55339 | H | 1.46113  | -3.36411 | -2.12553 |
| H | 5.64406  | 1.49975  | -2.44894 | H | 4.00244  | -1.81422 | -1.70182 |
| H | 4.83821  | 0.22217  | -3.40109 | H | 5.71760  | -2.31362 | -1.80610 |
| H | 3.86813  | 1.27467  | -2.32898 | H | 4.82844  | -2.50485 | -0.27470 |
| H | 7.24232  | 0.87980  | 2.39501  | H | 6.09201  | 1.79574  | 2.96224  |
| H | -1.24345 | -0.24247 | 1.38930  | H | -1.35569 | 0.01445  | 1.56443  |
| H | -0.18332 | -2.12009 | -2.30498 | H | -1.13446 | -1.58917 | -2.40254 |
| H | -1.99096 | -3.81253 | -1.96310 | H | -3.41871 | -2.51655 | -2.13850 |
| H | -2.22387 | -0.97881 | 3.40127  | H | -4.91874 | -2.39779 | 2.40846  |
| H | -3.96732 | -1.25065 | 3.64184  | H | -4.69971 | -1.23773 | 3.74871  |
| H | -3.42494 | -0.03045 | 2.46014  | H | -3.34992 | -2.30295 | 3.27106  |
| H | -4.03867 | -3.71461 | 0.91400  | H | -5.28134 | -2.60354 | -0.78220 |
| N | -2.21719 | 1.39800  | -2.08980 | C | -0.33379 | 2.83718  | -3.00360 |
| C | -3.43196 | 2.22530  | -1.95194 | C | -1.70310 | 2.33989  | -2.57739 |
| C | -4.12450 | 2.08742  | -0.57689 | O | -1.84984 | 2.54697  | -1.16949 |
| C | -3.12826 | 2.50052  | 0.52994  | C | -3.14444 | 2.20025  | -0.67290 |
| N | -3.70656 | 2.41749  | 1.88148  | C | -3.21273 | 2.57944  | 0.80451  |
| H | -3.13196 | 3.26881  | -2.09566 | H | -1.82513 | 1.26978  | -2.79957 |
| H | -4.17601 | 1.99460  | -2.72844 | H | -2.49723 | 2.88440  | -3.10618 |
| C | -5.33552 | 3.03938  | -0.57762 | H | -3.32131 | 1.12462  | -0.79580 |
| C | -4.61405 | 0.64367  | -0.37046 | H | -3.91950 | 2.74054  | -1.23156 |
| H | -2.26950 | 1.83094  | 0.50877  | H | -0.19720 | 2.68336  | -4.07728 |
| H | -2.74984 | 3.50721  | 0.28986  | H | 0.46147  | 2.30640  | -2.47602 |
| H | -2.98551 | 2.59841  | 2.57231  | H | -0.23184 | 3.90330  | -2.78948 |
| H | -4.41881 | 3.12687  | 2.02087  | H | -2.33854 | 2.17318  | 1.32558  |
| H | -6.01068 | 2.81197  | -1.40800 | O | -4.42947 | 2.13771  | 1.38872  |
| H | -5.02126 | 4.08409  | -0.67482 | H | -3.17841 | 3.66689  | 0.90388  |
| H | -5.91659 | 2.93950  | 0.34283  | H | -4.33517 | 1.21158  | 1.65350  |
| H | -2.44256 | 0.40808  | -2.02762 |   |          |          |          |
| H | -1.80898 | 1.53881  | -3.00926 |   |          |          |          |
| H | -5.31696 | 0.35752  | -1.15940 |   |          |          |          |
| H | -5.12057 | 0.54723  | 0.59110  |   |          |          |          |
| H | -3.78897 | -0.07087 | -0.37159 |   |          |          |          |

### Lignin–benzyl alcohol-1

59

Energy: -1458.41067599

|   |          |          |         |
|---|----------|----------|---------|
| O | -0.55354 | 0.82959  | 1.77957 |
| C | -0.36769 | -0.53211 | 1.69391 |
| C | 0.11915  | 1.64943  | 0.80921 |
| C | 0.91492  | -1.11563 | 1.77915 |

### Lignin–furfuryl alcohol-1

56

Energy: -1456.19460258

|   |          |          |         |
|---|----------|----------|---------|
| O | 0.56593  | -1.13900 | 1.25839 |
| C | 1.29970  | 0.00731  | 1.40289 |
| C | -0.85089 | -1.09594 | 1.07714 |
| C | 2.69743  | -0.18783 | 1.48669 |

|   |          |          |          |   |          |          |          |
|---|----------|----------|----------|---|----------|----------|----------|
| C | -1.48657 | -1.34863 | 1.59807  | C | 0.77718  | 1.29195  | 1.48549  |
| C | -0.85516 | 2.27190  | -0.21189 | C | -1.22565 | -0.72236 | -0.37905 |
| C | 0.87914  | 2.71516  | 1.60316  | C | -1.32208 | -2.48807 | 1.50138  |
| O | 1.96526  | -0.25455 | 1.91589  | O | 3.11522  | -1.48144 | 1.38322  |
| C | 1.03723  | -2.50489 | 1.72331  | C | 3.53131  | 0.91201  | 1.65313  |
| C | -1.36169 | -2.73667 | 1.55971  | C | 1.62664  | 2.39141  | 1.65079  |
| O | -1.47873 | 3.40737  | 0.41079  | O | -0.77350 | -1.70478 | -1.31228 |
| C | -1.84675 | 1.27060  | -0.75767 | C | -2.71763 | -0.46113 | -0.49147 |
| O | 1.42136  | 3.73977  | 0.75214  | O | -0.63844 | -3.51472 | 0.76973  |
| C | 3.27749  | -0.79701 | 2.04399  | C | 4.51444  | -1.74670 | 1.46296  |
| C | -0.09711 | -3.31130 | 1.61347  | C | 2.99619  | 2.20052  | 1.73270  |
| C | -3.10600 | 1.10914  | -0.17836 | C | -3.22982 | 0.75754  | -0.02140 |
| C | -1.48777 | 0.44941  | -1.82652 | C | -3.59213 | -1.41089 | -1.00791 |
| C | -4.00160 | 0.15317  | -0.64700 | C | -4.59570 | 1.00643  | -0.06090 |
| C | -2.36835 | -0.52037 | -2.29591 | C | -4.96584 | -1.16371 | -1.04924 |
| O | -5.25014 | 0.08448  | -0.08134 | O | -5.21561 | 2.15686  | 0.35849  |
| C | -3.62852 | -0.67346 | -1.72043 | C | -5.47570 | 0.03529  | -0.57542 |
| C | -5.55363 | -1.12177 | 0.63303  | C | -4.41275 | 3.22033  | 0.85830  |
| O | -4.54010 | -1.59396 | -2.16707 | O | -6.81699 | 0.27105  | -0.62150 |
| H | 0.82200  | 1.04654  | 0.23868  | H | -1.30849 | -0.36527 | 1.75259  |
| H | -2.45320 | -0.86885 | 1.54252  | H | -0.29010 | 1.45204  | 1.41871  |
| H | -0.22691 | 2.61798  | -1.04158 | H | -0.68576 | 0.19494  | -0.63212 |
| H | 1.71531  | 2.24275  | 2.11473  | H | -1.15759 | -2.61219 | 2.57641  |
| H | 0.20530  | 3.14868  | 2.34460  | H | -2.38499 | -2.60635 | 1.29043  |
| H | 2.01491  | -2.96408 | 1.76695  | H | 4.60302  | 0.77973  | 1.69216  |
| H | -2.24722 | -3.35619 | 1.47957  | H | 1.20476  | 3.38793  | 1.70458  |
| H | -2.16855 | 3.73484  | -0.17631 | H | -0.70675 | -2.56448 | -0.86385 |
| H | 0.69192  | 4.33101  | 0.52740  | H | 0.30009  | -3.43817 | 0.98833  |
| H | 3.94287  | 0.06069  | 2.13083  | H | 5.05237  | -1.26120 | 0.64453  |
| H | 3.36047  | -1.41386 | 2.94557  | H | 4.61317  | -2.82743 | 1.37238  |
| H | 3.55696  | -1.37920 | 1.16309  | H | 4.92314  | -1.42517 | 2.42741  |
| H | 0.01960  | -4.38828 | 1.57462  | H | 3.66395  | 3.04622  | 1.84211  |
| H | -3.40597 | 1.71632  | 0.66662  | H | -2.55104 | 1.51282  | 0.35592  |
| H | -0.51989 | 0.56732  | -2.30116 | H | -3.19993 | -2.33937 | -1.40239 |
| H | -2.08499 | -1.15354 | -3.13195 | H | -5.65570 | -1.89291 | -1.45648 |
| H | -4.87262 | -1.24630 | 1.48272  | H | -3.70812 | 3.57316  | 0.09768  |
| H | -5.49839 | -1.99613 | -0.01875 | H | -5.10211 | 4.02274  | 1.11503  |
| H | -6.57151 | -1.00340 | 1.00291  | H | -3.86305 | 2.91212  | 1.75443  |
| H | -4.16682 | -2.08355 | -2.90712 | H | -6.97917 | 1.15614  | -0.26924 |
| C | 3.64686  | 1.69477  | -1.09477 | C | 2.48365  | -0.85005 | -1.99985 |
| C | 3.68304  | 0.19067  | -1.27286 | C | 3.40066  | 0.31108  | -1.80844 |
| C | 2.51671  | -0.56023 | -1.41504 | C | 3.23417  | 1.65337  | -1.92290 |
| C | 2.57128  | -1.95131 | -1.49832 | C | 4.50607  | 2.24676  | -1.61784 |
| C | 3.79858  | -2.60928 | -1.45343 | C | 5.35130  | 1.22269  | -1.34040 |
| C | 4.97323  | -1.86411 | -1.33062 | O | 4.69232  | 0.02525  | -1.45435 |
| C | 4.91331  | -0.47552 | -1.24279 | O | 1.29041  | -0.38922 | -2.60628 |



|   |         |          |          |   |         |          |          |
|---|---------|----------|----------|---|---------|----------|----------|
| O | 2.38179 | 2.24266  | -1.42878 | H | 2.98968 | -1.60055 | -2.62668 |
| H | 3.89398 | 1.92527  | -0.04879 | H | 2.28100 | -1.32322 | -1.02988 |
| H | 4.43259 | 2.14889  | -1.71415 | H | 2.31480 | 2.14332  | -2.19428 |
| H | 1.56555 | -0.04927 | -1.45416 | H | 4.75350 | 3.29663  | -1.60898 |
| H | 1.65097 | -2.51782 | -1.58298 | H | 6.39222 | 1.16444  | -1.07072 |
| H | 3.84272 | -3.69077 | -1.51689 | H | 0.56322 | -0.95787 | -2.30142 |
| H | 5.93450 | -2.36556 | -1.30407 |   |         |          |          |
| H | 5.83120 | 0.09711  | -1.14504 |   |         |          |          |
| H | 2.14721 | 2.90476  | -0.75603 |   |         |          |          |

### Lignin-isobutyl acetate-1

63

Energy: -1497.98931539

|   |          |          |          |
|---|----------|----------|----------|
| O | -3.20375 | 0.46385  | 0.38795  |
| C | -4.02043 | -0.21512 | -0.47350 |
| C | -1.77885 | 0.28050  | 0.35542  |
| C | -5.38132 | -0.26682 | -0.10817 |
| C | -3.60795 | -0.80234 | -1.67025 |
| C | -1.21754 | 1.45268  | 1.19190  |
| C | -1.40097 | -1.10012 | 0.87464  |
| O | -5.82946 | 0.33297  | 1.04021  |
| C | -6.29850 | -0.87258 | -0.95973 |
| C | -4.53947 | -1.41683 | -2.50954 |
| O | -1.74915 | 2.67710  | 0.69231  |
| C | 0.29178  | 1.49843  | 1.11160  |
| O | -1.81215 | -1.20196 | 2.24107  |
| C | -5.41080 | -0.28854 | 2.26757  |
| C | -5.88570 | -1.44740 | -2.16227 |
| C | 0.91275  | 2.21335  | 0.08000  |
| C | 1.07619  | 0.78601  | 2.01270  |
| C | 2.29797  | 2.21045  | -0.05941 |
| C | 2.46566  | 0.77526  | 1.87763  |
| O | 2.97687  | 2.85382  | -1.05240 |
| C | 3.08982  | 1.47675  | 0.85020  |
| C | 2.23516  | 3.65694  | -1.96107 |
| O | 4.43925  | 1.49053  | 0.67242  |
| H | -1.40404 | 0.39843  | -0.66722 |
| H | -2.56663 | -0.77261 | -1.96248 |
| H | -1.52751 | 1.30017  | 2.23094  |
| H | -0.31867 | -1.22513 | 0.77619  |
| H | -1.89908 | -1.85988 | 0.26180  |
| H | -7.33913 | -0.88035 | -0.65741 |
| H | -4.20287 | -1.86402 | -3.43774 |
| H | -2.70501 | 2.55983  | 0.62599  |

|   |          |          |          |
|---|----------|----------|----------|
| H | -1.66835 | -2.10411 | 2.54010  |
| H | -4.32279 | -0.33312 | 2.34597  |
| H | -5.81634 | 0.32852  | 3.06892  |
| H | -5.83130 | -1.29870 | 2.33807  |
| H | -6.61112 | -1.91788 | -2.81523 |
| H | 0.28982  | 2.77584  | -0.60013 |
| H | 0.60603  | 0.23398  | 2.81903  |
| H | 3.08337  | 0.22108  | 2.57518  |
| H | 2.97007  | 4.09711  | -2.63345 |
| H | 1.69216  | 4.45358  | -1.44112 |
| H | 1.52564  | 3.05629  | -2.54281 |
| H | 4.82094  | 0.69367  | 1.07658  |
| C | 4.62977  | -2.25489 | 0.82514  |
| C | 4.60027  | -3.55044 | 1.59337  |
| O | 5.04421  | -1.20626 | 1.27611  |
| O | 4.14909  | -2.42073 | -0.41215 |
| C | 4.11863  | -1.29068 | -1.33168 |
| C | 2.85070  | -1.36720 | -2.17462 |
| C | 1.59458  | -1.34740 | -1.29649 |
| C | 2.85657  | -0.19690 | -3.16941 |
| H | 4.84326  | -3.36246 | 2.63697  |
| H | 3.61929  | -4.02047 | 1.50497  |
| H | 5.33409  | -4.23809 | 1.16505  |
| H | 5.01526  | -1.36407 | -1.95253 |
| H | 4.15933  | -0.35968 | -0.77193 |
| H | 2.87319  | -2.30984 | -2.73486 |
| H | 0.69424  | -1.41222 | -1.91478 |
| H | 1.58827  | -2.19028 | -0.60169 |
| H | 1.54240  | -0.42366 | -0.71496 |
| H | 1.96308  | -0.22402 | -3.79867 |
| H | 3.72994  | -0.23125 | -3.82757 |
| H | 2.87327  | 0.76028  | -2.63950 |
